# Supplementary material for: The circular RNome of primary breast cancer
Source: HighWire-hosted journal article supplement (doi:10.1101/gr.238121.118), 2019-01-28
Supplement: Supplemental_Tables_S1_S2_S3.xlsx [file Supplemental_Tables_S1_S2_S3.xlsx]

## Sheet: Add. Table 1 - circRNAs BC
Circular region GRCh38/hg38	Nr of samples with at least 5 junction reads (out of 348)	Region start and end match exactly with exons of same gene	Ensembl gene ID	Gene name	Breast cancer driver	Circular region has start codon	Correlation coefficient with linear full gene	Region possibly spliced from
chrX:140783175-140784659	339	no	ENSG00000184258.6	CDR1		yes	0.554097
chr8:130152736-130180880	331	yes	ENSG00000153317.14	ASAP1		no	0.133127
chr2:40428473-40430304	330	yes	ENSG00000183023.18	SLC8A1		yes	0.802298
chr15:64499293-64500166	329	yes	ENSG00000180357.9	ZNF609		yes	0.155448
chr6:18236452-18258405	327	yes	ENSG00000124795.14	DEK		no	0.493329
chr6:158312051-158314268	327	yes	ENSG00000130338.12	TULP4		yes	0.317216
chr8:115587001-115623758	325	yes	ENSG00000104447.11	TRPS1		yes	0.484494
chr5:168488602-168494650	324	yes	ENSG00000113643.8	RARS		no	0.586629
chr17:20204333-20205912	324	yes	ENSG00000128487.16	SPECC1		yes	0.678798	ENST00000467722.2
chr6:158282263-158314268	324	yes	ENSG00000130338.12	TULP4		yes	0.31027
chr10:7797047-7802854	324	yes	ENSG00000165629.19	ATP5C1		no	0.526008	ENST00000465936.5
chr7:155672867-155680908	324	yes	ENSG00000184863.10	RBM33		no	-0.166945
chr14:32090502-32094386	323	yes	ENSG00000100852.12	ARHGAP5		yes	0.572342	ENST00000554090.1
chr1:117402186-117420649	321	yes	ENSG00000198162.12	MAN1A2		no	0.548064
chr3:196391813-196403019	319	yes	ENSG00000163960.11	UBXN7		no	0.0786907	ENST00000428095.1
chr14:99458279-99465813	319	yes	ENSG00000183576.12	SETD3		yes	0.380195
chr1:117402186-117442325	319	yes	ENSG00000198162.12	MAN1A2		no	0.45463
chr7:100023419-100024307	318	yes	ENSG00000106261.16	ZKSCAN1		yes	0.0849155	ENST00000535170.5
chr6:4891713-4892379	318	yes	ENSG00000153046.17	CDYL		yes	0.657099	ENST00000440139.5
chr13:32517857-32527532	318	yes	ENSG00000244754.8	N4BP2L2		yes	0.0178705
chr9:135881633-135883078	317	yes	ENSG00000130559.18	CAMSAP1		no	0.363418
chr4:128992167-129003876	317	yes	ENSG00000151466.11	SCLT1		no	0.28015	ENST00000439369.6
chr17:67945409-67975958	317	yes	ENSG00000171634.16	BPTF		no	0.589471
chr18:9182382-9221999	317	no	ENSG00000265257.5	RP11-21J18.1		yes
chr6:13632370-13644729	316	yes	ENSG00000010017.12	RANBP9		no	0.427309
chr10:32543300-32584304	316	yes	ENSG00000216937.11	CCDC7		yes	-0.0296577
chr3:149846011-149921227	315	yes	ENSG00000082996.19	RNF13		yes	0.48653
chr1:205616478-205623891	315	yes	ENSG00000158711.13	ELK4		yes	0.278921
chr4:152411303-152412529	314	yes	ENSG00000109670.13	FBXW7	yes	yes	0.276212
chr3:172247533-172251541	310	yes	ENSG00000075420.12	FNDC3B		no	0.613275
chr14:32090502-32117287	310	yes	ENSG00000100852.12	ARHGAP5		yes	0.660384	ENST00000396582.6
chr1:41070595-41075451	307	yes	ENSG00000010803.16	SCMH1		no	0.171824
chr6:31268940-31354060	307	no				yes
chr1:8655973-8656441	306	yes	ENSG00000142599.17	RERE		yes	-0.0590487
chr12:116230533-116237705	304	no				no
chr5:36953618-36976402	303	yes	ENSG00000164190.16	NIPBL		yes	0.231157	ENST00000621733.1
chr1:23397545-23418016	303	no	ENSG00000204219.9	TCEA3		no
chr10:32565558-32584304	303	yes	ENSG00000216937.11	CCDC7		yes	0.045625
chr8:140864312-140890769	302	yes	ENSG00000169398.19	PTK2		yes	0.461933
chr1:247156406-247159813	302	no				no
chr15:92996957-93002317	298	yes	ENSG00000173575.18	CHD2		no	0.0276335
chr2:230442937-230450255	297	yes	ENSG00000067066.16	SP100		yes	0.340722
chr15:92996957-92998621	296	yes	ENSG00000173575.18	CHD2		no	-0.0442418
chr12:95208843-95211267	296	yes	ENSG00000180263.13	FGD6		no	0.433419	ENST00000451107.3
chr16:68121987-68126610	296	no	ENSG00000261864.1	RP11-67A1.2		no		ENST00000566893.5
chr3:170359699-170361429	295	yes	ENSG00000136603.13	SKIL		yes	0.491748
chr9:111386377-111391824	295	yes	ENSG00000136813.14	KIAA0368		no	0.201455
chr8:51860845-51861246	295	yes	ENSG00000168300.13	PCMTD1		yes	0.367215	ENST00000544451.2
chr11:33286413-33287511	294	yes	ENSG00000110422.11	HIPK3		yes	0.673183
chr19:23358430-23362725	294	yes	ENSG00000167232.13	ZNF91		no	0.751028	ENST00000596989.1
chr21:36338772-36344707	294	no				no
chr14:39179091-39179462	290	yes	ENSG00000100941.8	PNN		no	0.153323
chr1:31915895-31919658	290	yes	ENSG00000184007.17	PTP4A2		yes	0.561522
chr21:36338775-36344707	290	no				no
chr4:51863437-51891851	289	yes	ENSG00000109184.14	DCUN1D4		no	0.199159
chr7:158869855-158876691	289	yes	ENSG00000126870.15	WDR60		no	0.17387
chr5:123545417-123557564	289	yes	ENSG00000151292.17	CSNK1G3		yes	0.424632	ENST00000511130.6
chr12:27714780-27724186	288	yes	ENSG00000061794.12	MRPS35		no	0.243791	ENST00000542791.1
chr15:25405461-25411971	288	yes	ENSG00000114062.17	UBE3A		yes	-0.0462904
chr1:155438327-155459898	288	yes	ENSG00000116539.10	ASH1L		no	-0.0187858
chr2:72718103-72733118	288	yes	ENSG00000144036.14	EXOC6B		no	0.208681
chr21:39206108-39212707	288	yes	ENSG00000185658.13	BRWD1		no	0.0409388
chr4:73090667-73092300	286	yes	ENSG00000132466.17	ANKRD17		no	0.326269
chr1:35358925-35361789	285	yes	ENSG00000146463.11	ZMYM4		no	0.283803
chr7:39987599-40002031	284	yes	ENSG00000065883.14	CDK13		yes	0.247198
chr1:169978085-170031975	284	no	ENSG00000075945.12	KIFAP3		no
chr2:61522611-61533903	283	yes	ENSG00000082898.16	XPO1		yes	0.235534
chr5:73074742-73077493	282	yes	ENSG00000157107.13	FCHO2		no	0.0435812
chr21:29321221-29329693	281	yes	ENSG00000156273.15	BACH1		yes	0.551061
chr3:138570318-138571356	279	yes	ENSG00000114107.8	CEP70		no	0.194636	ENST00000489254.5
chr4:105233897-105237351	279	yes	ENSG00000168769.12	TET2	yes	yes	0.301245
chr1:224952670-224974153	279	yes	ENSG00000185842.14	DNAH14		yes	0.253179
chr5:154033791-154034967	278	yes	ENSG00000055147.17	FAM114A2		yes	0.369831	ENST00000517803.5
chr9:86305192-86310017	277	yes	ENSG00000083223.17	ZCCHC6		no	0.142482
chr4:37631385-37638504	276	yes	ENSG00000181826.9	RELL1		no	0.728177
chr12:28305649-28307749	274	yes	ENSG00000123106.10	CCDC91		no	0.568543	ENST00000536154.5
chr11:34957384-34978182	273	yes	ENSG00000110435.11	PDHX		no	0.345064	ENST00000430469.6
chr8:61618978-61653660	273	yes	ENSG00000198363.15	ASPH		yes	0.476294	ENST00000522349.5
chr8:141253989-141254629	271	yes	ENSG00000022567.9	SLC45A4		yes	0.28856	ENST00000520137.1
chr4:128074460-128077962	271	yes	ENSG00000138709.17	LARP1B		yes	0.118763
chr5:137985257-137988315	270	yes	ENSG00000031003.10	FAM13B		no	0.14092
chr5:56864734-56865977	270	yes	ENSG00000095015.5	MAP3K1	yes	no	0.293543
chr5:36982165-36986301	270	no				no
chr20:35653528-35659014	269	yes	ENSG00000214078.11	CPNE1		yes	0.251509	ENST00000439806.6
chr21:36338779-36344707	268	no				no
chr14:65561337-65561766	267	yes	ENSG00000033170.16	FUT8		yes	0.198126	ENST00000557164.5
chr10:126970702-127127764	267	yes	ENSG00000150760.12	DOCK1		no	0.588565
chr10:68959806-68960249	267	yes	ENSG00000165732.12	DDX21		yes	0.241985
chr6:116689320-116692392	267	yes	ENSG00000196911.9	KPNA5		no	0.255482
chr15:80120328-80122800	266	yes	ENSG00000086666.18	ZFAND6		yes	0.3641
chr15:63696124-63716473	264	yes	ENSG00000103657.13	HERC1		no	-0.0277121
chr8:108449823-108455930	264	yes	ENSG00000104412.7	EMC2		no	0.191666
chr5:65988635-65994864	264	yes	ENSG00000112851.14	ERBB2IP		yes	0.100806
chr4:55411614-55417985	264	yes	ENSG00000134851.12	TMEM165		no	0.511693	ENST00000506198.5
chr1:26729651-26732792	263	yes	ENSG00000117713.17	ARID1A	yes	yes	0.193154
chr1:8541214-8614686	263	yes	ENSG00000142599.17	RERE		no	0.121777
chr9:5968019-5988545	263	yes	ENSG00000183354.11	KIAA2026		no	0.26798
chr1:23030469-23050520	262	yes	ENSG00000004487.15	KDM1A		no	0.038438
chr21:15762891-15766141	262	yes	ENSG00000155313.15	USP25		no	0.351886
chr5:71035545-71037546	262	no				no
chr9:93471141-93498886	261	yes	ENSG00000048828.16	FAM120A		no	0.281699
chr1:66891154-66905375	261	yes	ENSG00000152763.16	WDR78		yes	0.433848
chr7:139715932-139717015	260	yes	ENSG00000064393.15	HIPK2		yes	0.157317
chr11:120474560-120477526	260	yes	ENSG00000196914.8	ARHGEF12		no	0.263869
chr7:152309966-152315338	259	yes	ENSG00000055609.17	KMT2C		no	-0.125678
chr11:86007542-86031611	259	yes	ENSG00000073921.17	PICALM		yes	0.418202
chr14:49825867-49831361	259	yes	ENSG00000165525.17	NEMF		no	0.341166
chr5:50399107-50411383	259	no				no
chr5:57246300-57251141	258	yes	ENSG00000062194.15	GPBP1		yes	0.309297
chr4:48369849-48383784	258	yes	ENSG00000109171.14	SLAIN2		yes	0.452227
chr2:214767482-214781509	258	yes	ENSG00000138376.10	BARD1		no	0.673065	ENST00000421162.1
chr14:45118028-45130790	256	no	ENSG00000100442.10	FKBP3		no
chr20:41533050-41551360	256	yes	ENSG00000124177.14	CHD6		yes	0.0541478
chr11:65499666-65499845	255	no				no
chr11:32927157-32935435	253	yes	ENSG00000060749.14	QSER1		yes	0.516184
chr16:47497399-47515601	253	yes	ENSG00000102893.15	PHKB		no	0.434395	ENST00000565424.2
chr4:94573351-94586444	253	yes	ENSG00000163110.14	PDLIM5		no	0.420897
chr18:24064140-24083081	253	yes	ENSG00000168234.12	TTC39C		yes	0.290753
chr8:140818277-140890769	253	yes	ENSG00000169398.19	PTK2		yes	0.428596
chr19:8455405-8463686	252	yes	ENSG00000099783.11	HNRNPM		no	-0.00499909
chr2:202464809-202467689	252	yes	ENSG00000204217.12	BMPR2		no	0.248641
chr20:33619517-33623296	250	yes	ENSG00000078699.21	CBFA2T2		no	0.0785504
chr1:247155566-247159813	250	no				no
chr11:86011030-86031611	249	yes	ENSG00000073921.17	PICALM		yes	0.49477
chr8:115603873-115623758	249	yes	ENSG00000104447.11	TRPS1		yes	0.418247
chr8:18011237-18011827	248	yes	ENSG00000078674.17	PCM1		no	0.634178
chr5:66053406-66054951	248	yes	ENSG00000112851.14	ERBB2IP		no	0.185788	ENST00000416865.6
chr2:171337453-171339554	248	yes	ENSG00000123600.18	METTL8		no	0.192616	ENST00000460188.5
chr6:138943513-138944622	248	yes	ENSG00000135597.18	REPS1		no	0.14713	ENST00000483468.5
chr15:84680713-84691644	248	yes	ENSG00000140612.13	SEC11A		yes	0.619765
chr12:116236821-116237705	248	no				no
chr20:35714185-35725155	247	yes	ENSG00000131051.20	RBM39		no	0.0339347
chr1:180984677-180993425	247	yes	ENSG00000135823.13	STX6		yes	0.21537
chr10:31908172-31910563	247	yes	ENSG00000165322.17	ARHGAP12		yes	0.182789
chr17:59731421-59738947	245	yes	ENSG00000062716.10	VMP1		yes	0.188143
chr2:112399632-112400194	245	yes	ENSG00000169629.11	RGPD8		no	-0.0598015
chr3:170136419-170149244	245	yes	ENSG00000173889.15	PHC3		no	-0.147526	ENST00000484931.5
chr7:129014979-129018157	244	yes	ENSG00000064419.13	TNPO3		yes	0.570622
chr13:95757644-95763953	244	yes	ENSG00000102580.14	DNAJC3		no	0.293515
chr7:103321932-103322794	244	yes	ENSG00000105821.14	DNAJC2		no	0.498025
chr15:89113725-89116521	244	yes	ENSG00000140526.16	ABHD2		yes	0.381445
chr21:36247517-36248568	244	yes	ENSG00000142197.12	DOPEY2		no	0.0809323
chr10:31908172-31908926	244	yes	ENSG00000165322.17	ARHGAP12		yes	0.290367
chr1:46055795-46080750	243	yes	ENSG00000117461.14	PIK3R3		no	0.54789
chr10:126970702-126990603	243	yes	ENSG00000150760.12	DOCK1		no	0.462713
chr8:47396376-47407961	243	yes	ENSG00000164808.16	SPIDR		no	0.164362	ENST00000521550.5
chr5:176943335-176958154	242	yes	ENSG00000087206.16	UIMC1		no	-0.0176275
chr5:139363759-139364743	242	yes	ENSG00000120727.12	PAIP2		yes	0.459668
chr14:96833467-96860735	241	yes	ENSG00000100749.7	VRK1		yes	0.696637
chr2:147896301-147899898	241	yes	ENSG00000121989.14	ACVR2A		yes	0.379317
chr12:116230433-116237705	241	no				no
chr16:18841565-18845651	240	yes	ENSG00000157106.16	SMG1		no	-0.0782031
chr3:56592970-56594028	240	yes	ENSG00000180376.16	CCDC66		no	0.0331945
chr8:94664697-94665196	239	yes	ENSG00000104413.15	ESRP1		no	0.36627
chr2:120127688-120175004	239	no	ENSG00000115109.13	EPB41L5		no
chr4:73085249-73092300	239	yes	ENSG00000132466.17	ANKRD17		no	0.0745359
chr11:46076754-46092223	239	yes	ENSG00000135365.15	PHF21A		yes	-0.110058
chr3:197865423-197875775	239	yes	ENSG00000186001.12	LRCH3		no	0.193112
chr10:49915917-49935142	239	yes	ENSG00000227345.8	PARG		no	0.426266	ENST00000610922.1
chr7:105073619-105077433	238	yes	ENSG00000005483.19	KMT2E		no	0.236563
chr18:12999421-13019206	238	yes	ENSG00000101639.18	CEP192		yes	0.243872
chr5:168488602-168497348	238	yes	ENSG00000113643.8	RARS		no	0.540549
chr2:189791790-189818180	237	yes	ENSG00000064933.16	PMS1		yes	0.133551
chr16:30728966-30729572	237	yes	ENSG00000080603.16	SRCAP		no	-0.344666
chr11:18291442-18292976	237	yes	ENSG00000110756.17	HPS5		no	0.335181	ENST00000543728.1
chr1:167951800-167975015	237	yes	ENSG00000143164.15	DCAF6		no	0.278027
chr11:130260856-130261929	237	yes	ENSG00000196323.11	ZBTB44		yes	0.263559
chrX:10063445-10098579	234	yes	ENSG00000047644.17	WWC3		yes	0.495461
chr7:80789306-80810701	234	yes	ENSG00000075223.13	SEMA3C		no	0.551186
chr2:71396141-71418639	234	yes	ENSG00000075292.18	ZNF638		no	0.107092
chr8:102360071-102361626	234	yes	ENSG00000104517.12	UBR5		no	0.0796773
chr11:77698487-77702495	233	yes	ENSG00000048649.13	RSF1		yes	0.676365
chr3:172251260-172310881	233	yes	ENSG00000075420.12	FNDC3B		no	0.396072
chr15:58912563-58913696	233	yes	ENSG00000137776.16	SLTM		no	0.333705	ENST00000559305.5
chr6:158580940-158589782	233	yes	ENSG00000146433.8	TMEM181		no	0.208266
chr15:58912563-58916999	232	yes	ENSG00000137776.16	SLTM		no	0.281653
chr18:9583117-9595102	232	yes	ENSG00000154845.15	PPP4R1		no	0.371758
chr3:125313308-125331238	231	yes	ENSG00000163848.18	ZNF148		yes	0.0153803
chr11:65499048-65499273	231	no				no
chr18:12999421-13030608	230	yes	ENSG00000101639.18	CEP192		yes	0.344127
chr4:87195324-87195690	230	yes	ENSG00000145332.13	KLHL8		yes	0.282551	ENST00000505388.5
chr3:196487399-196488683	229	yes	ENSG00000163961.4	RNF168		no	0.433583
chr7:158759486-158764853	228	yes	ENSG00000117868.15	ESYT2		no	0.56601
chr9:83678441-83686155	228	yes	ENSG00000135018.13	UBQLN1		no	0.511075
chr3:138570318-138572932	227	yes	ENSG00000114107.8	CEP70		yes	0.427111	ENST00000489254.5
chr11:73707420-73718718	227	yes	ENSG00000175582.19	RAB6A		no	0.186109	ENST00000541588.5
chr4:185247294-185267155	226	yes	ENSG00000109762.15	SNX25		yes	0.229707
chr13:75560753-75569507	226	yes	ENSG00000118939.17	UCHL3		yes	-0.189175
chr9:107300141-107311737	226	yes	ENSG00000119318.12	RAD23B		yes	0.511421
chr18:76849526-76851939	226	yes	ENSG00000130856.15	ZNF236		no	-0.0548567
chr16:80684538-80685129	226	yes	ENSG00000166446.14	CDYL2		no	0.329531
chr3:47097955-47106120	226	yes	ENSG00000181555.19	SETD2	yes	no	0.0183188
chr1:26942660-26943065	225	yes	ENSG00000090273.13	NUDC		no	0.445366
chr20:35729312-35732135	225	yes	ENSG00000131051.20	RBM39		no	0.110611
chr5:134741063-134744052	224	yes	ENSG00000164615.4	CAMLG		no	0.354807
chr18:32111754-32113860	224	no	ENSG00000263917.1	RP11-53I6.2		no		ENST00000257190.9
chr2:8908621-8958642	223	yes	ENSG00000143797.11	MBOAT2		no	0.342768
chr8:47279862-47294030	223	yes	ENSG00000164808.16	SPIDR		yes	0.285678
chr11:65499046-65499270	223	no				no
chr14:21230319-21234229	222	yes	ENSG00000092199.17	HNRNPC		yes	0.26824
chr1:117402186-117405645	222	yes	ENSG00000198162.12	MAN1A2		no	0.480678	ENST00000482811.1
chr11:85996826-86031611	221	yes	ENSG00000073921.17	PICALM		yes	0.488795
chr1:1223244-1223968	221	yes	ENSG00000078808.16	SDF4		no	0.391967
chr10:110964125-110985765	221	yes	ENSG00000108061.11	SHOC2		yes	0.671177	ENST00000489390.1
chr12:111554158-111555919	221	yes	ENSG00000204842.14	ATXN2		yes	-0.33179	ENST00000548492.1
chr8:38114192-38119363	220	yes	ENSG00000129691.15	ASH2L		no	0.67736
chr21:46349012-46349820	220	yes	ENSG00000160299.16	PCNT		no	0.128059
chr1:200760839-200815644	219	yes	ENSG00000118200.14	CAMSAP2		no	0.114995
chr15:51869217-51902036	219	yes	ENSG00000138594.12	TMOD3		no	0.335447
chr3:146121112-146124229	219	yes	ENSG00000152952.11	PLOD2		yes	0.406006
chr1:58506060-58539310	219	no	ENSG00000173406.15	DAB1		yes
chr9:111786793-111787947	219	no				no
chr10:126970702-127000307	218	yes	ENSG00000150760.12	DOCK1		no	0.3527
chr3:50065031-50066502	217	yes	ENSG00000004534.14	RBM6		no	-0.143083
chr11:77619606-77625818	217	yes	ENSG00000074201.8	CLNS1A		no	0.619803
chr4:39737420-39774933	217	yes	ENSG00000078140.13	UBE2K		no	0.149412
chr1:185214507-185231708	217	yes	ENSG00000116668.12	SWT1		no	0.45075
chr7:131375424-131399433	217	yes	ENSG00000128585.17	MKLN1		yes	0.275349
chr9:37126312-37126942	217	yes	ENSG00000147905.17	ZCCHC7		yes	0.327975
chr15:56388472-56394834	217	yes	ENSG00000151575.14	TEX9		yes	0.344918
chr18:24064140-24069271	217	yes	ENSG00000168234.12	TTC39C		yes	0.411829
chr1:114463104-114464388	217	yes	ENSG00000197323.10	TRIM33		no	0.104994
chr1:172551512-172557794	216	yes	ENSG00000094975.13	SUCO		no	0.205261
chr15:41668828-41669958	216	yes	ENSG00000174197.16	MGA		yes	0.329292	ENST00000568630.1
chr17:51263274-51268904	215	yes	ENSG00000011260.13	UTP18		no	0.320372
chr16:57164001-57173869	215	yes	ENSG00000172775.16	FAM192A		yes	0.258054
chr2:61113770-61118116	215	no				no
chrX:77652114-77656653	214	yes	ENSG00000085224.20	ATRX	yes	no	0.344715
chr3:195381009-195392147	214	yes	ENSG00000114331.12	ACAP2		no	0.1974
chr4:150798081-150817257	214	yes	ENSG00000198589.10	LRBA		no	0.0866902
chr7:30550636-30562128	214	no	ENSG00000281039.1	RP4-777O23.3		no
chr22:45793545-45807022	214	no				yes
chr17:46170855-46172232	213	yes	ENSG00000120071.12	KANSL1		yes	-0.171297
chr12:12244262-12244655	212	yes	ENSG00000070018.8	LRP6		no	0.732848	ENST00000535731.1
chr7:17868407-17875790	212	yes	ENSG00000071189.21	SNX13		no	-0.0349578
chr18:58934433-58953799	212	yes	ENSG00000074657.13	ZNF532		no	0.210899	ENST00000586997.1
chr5:32135572-32143880	212	yes	ENSG00000113384.13	GOLPH3		no	0.305008
chr1:145643869-145647267	212	yes	ENSG00000117262.18	GPR89A		no	0.029801
chr7:131387120-131399433	212	yes	ENSG00000128585.17	MKLN1		yes	0.192799
chr9:33960826-33973237	212	yes	ENSG00000137073.20	UBAP2		no	0.272225
chr12:45926142-45928859	212	yes	ENSG00000139218.17	SCAF11		yes	0.40582
chr15:41696075-41699159	212	yes	ENSG00000174197.16	MGA		no	0.275535
chrX:53645311-53654131	211	yes	ENSG00000086758.15	HUWE1		yes	0.320004
chr7:6463136-6466242	211	no				no
chr3:149895473-149921227	210	yes	ENSG00000082996.19	RNF13		yes	0.454664
chr21:37420299-37421866	210	no	ENSG00000157540.19	DYRK1A		yes
chr8:42906173-42943445	209	yes	ENSG00000168172.8	HOOK3		no	0.0560696
chr9:14639896-14680162	209	yes	ENSG00000175893.11	ZDHHC21		yes	0.188741
chr11:121045674-121060085	208	yes	ENSG00000154114.12	TBCEL		yes	0.217697
chrX:24172715-24179770	207	yes	ENSG00000005889.15	ZFX		yes	0.0819007	ENST00000459724.1
chr19:17276495-17276909	207	yes	ENSG00000105393.15	BABAM1		no	0.34608	ENST00000598567.1
chr10:84438512-84477664	207	yes	ENSG00000107771.15	CCSER2		no	0.285985
chr4:51863437-51877854	207	yes	ENSG00000109184.14	DCUN1D4		no	0.31353
chr9:33986760-34017189	207	yes	ENSG00000137073.20	UBAP2		yes	0.27281
chr1:8541214-8557523	207	yes	ENSG00000142599.17	RERE		no	-0.0943306
chr7:155665175-155680908	206	yes	ENSG00000184863.10	RBM33		no	-0.13546
chr1:32948222-32949774	205	yes	ENSG00000116514.16	RNF19B		no	0.485912
chr6:47283938-47286595	205	yes	ENSG00000146072.6	TNFRSF21		no	0.743134
chr2:207976651-207977586	205	yes	ENSG00000178385.13	PLEKHM3		no	0.410884
chr2:45546732-45553730	204	yes	ENSG00000068784.12	SRBD1		no	0.0737256
chr7:22960256-22991139	204	yes	ENSG00000122591.11	FAM126A		yes	0.492328
chr2:239990074-240007370	204	yes	ENSG00000130414.11	NDUFA10		no	0.209163
chr10:32451592-32474023	204	yes	ENSG00000216937.11	CCDC7		yes	0.247569
chr2:232787151-232796222	204	no				no
chr12:46229153-46243314	202	yes	ENSG00000111371.15	SLC38A1		yes	0.432626
chr1:70292388-70315566	202	yes	ENSG00000118454.12	ANKRD13C		no	0.199727
chr10:68644698-68647005	202	yes	ENSG00000138336.8	TET1		no	0.21835
chr7:42023468-42048696	201	yes	ENSG00000106571.12	GLI3		no	0.616579
chr12:69589485-69593613	201	yes	ENSG00000166226.12	CCT2		no	0.672018
chr12:99772922-99782097	201	yes	ENSG00000185046.18	ANKS1B		no	0.283187	ENST00000547010.5
chr15:85113873-85121014	200	yes	ENSG00000073417.14	PDE8A		no	0.22038
chr3:71041328-71053773	200	yes	ENSG00000114861.18	FOXP1	yes	yes	0.228766
chr6:3076764-3077935	199	yes	ENSG00000137275.13	RIPK1		yes	0.407891
chr4:76134175-76144473	199	yes	ENSG00000138750.14	NUP54		no	0.506579	ENST00000504173.1
chr6:32972243-32972463	199	no				no
chr6:72295937-72333835	198	yes	ENSG00000079841.18	RIMS1		no	0.737287	ENST00000425662.6
chr15:90439332-90443478	198	yes	ENSG00000140575.12	IQGAP1		no	0.405834	ENST00000560738.1
chr14:21503173-21503881	198	yes	ENSG00000165819.11	METTL3		no	0.100834
chr7:24623666-24668660	197	yes	ENSG00000105926.15	MPP6		yes	0.512359
chr12:69589485-69592159	197	yes	ENSG00000166226.12	CCT2		no	0.370033
chr21:37108392-37129063	197	yes	ENSG00000182670.13	TTC3		yes	0.243464
chr20:35716740-35725155	196	yes	ENSG00000131051.20	RBM39		no	-0.0956958
chrX:21978875-21992712	196	no				no
chr2:54982515-54987698	195	yes	ENSG00000115310.17	RTN4		no	0.0859923
chr3:170359699-170391260	195	yes	ENSG00000136603.13	SKIL		yes	0.358048
chr5:74745678-74750667	195	yes	ENSG00000164347.17	GFM2		no	0.324564
chr8:115619132-115623758	194	yes	ENSG00000104447.11	TRPS1		yes	0.261688
chr1:65913245-65918835	194	yes	ENSG00000184588.17	PDE4B		yes	0.333234
chr1:155853276-155853806	193	yes	ENSG00000116580.18	GON4L		yes	-0.159848
chr7:23611171-23611553	193	yes	ENSG00000169193.11	CCDC126		yes	0.402214
chr2:109564366-109593119	193	yes	ENSG00000186522.14	2010-09-01		yes	0.501149
chr6:154773989-154795139	193	yes	ENSG00000213079.9	SCAF8		no	0.160377
chr13:46003139-46020557	192	yes	ENSG00000123200.16	ZC3H13		no	0.610429
chr3:119500695-119504021	191	yes	ENSG00000113845.9	TIMMDC1		no	0.428283	ENST00000493694.1
chr8:18799295-18804898	191	yes	ENSG00000156011.16	PSD3		no	0.33739
chr18:9524594-9525851	190	yes	ENSG00000017797.11	RALBP1		no	0.213212
chr2:233388257-233390483	190	yes	ENSG00000077044.9	DGKD		no	0.10289	ENST00000427930.5
chr10:31373018-31461237	190	yes	ENSG00000148516.21	ZEB1		no	0.344777	ENST00000542815.7
chr12:120782655-120784593	190	yes	ENSG00000157837.15	SPPL3		no	0.239311
chr5:79640851-79669028	190	yes	ENSG00000164329.13	PAPD4		no	-0.0282584
chr13:32535769-32537027	190	yes	ENSG00000244754.8	N4BP2L2		yes	0.138608	ENST00000511143.5
chr22:45729425-45740538	189	yes	ENSG00000130638.15	ATXN10		no	0.435315
chr8:115587001-115620060	188	yes	ENSG00000104447.11	TRPS1		yes	0.229479
chr11:36227085-36227430	188	yes	ENSG00000179241.12	LDLRAD3		no	0.209956	ENST00000532490.1
chr10:179994-221356	187	yes	ENSG00000015171.18	ZMYND11		yes	0.334691
chr20:35721740-35725155	187	yes	ENSG00000131051.20	RBM39		no	-0.0217592
chr7:149018992-149021147	187	yes	ENSG00000155660.10	PDIA4		no	0.140796
chr5:95755396-95763620	187	yes	ENSG00000164292.12	RHOBTB3		no	0.581869
chr2:109825876-109826438	186	yes	ENSG00000015568.12	RGPD5		no	0.0271133
chr4:38089932-38103157	186	yes	ENSG00000065882.15	TBC1D1		yes	0.493823
chr2:61115979-61118116	186	yes	ENSG00000162929.13	KIAA1841		no	0.0362749
chr9:16727797-16738485	186	yes	ENSG00000173068.17	BNC2		no	0.314815
chr2:168063500-168129758	186	yes	ENSG00000198648.10	STK39		no	0.474132
chr20:41092472-41101353	186	yes	ENSG00000198900.5	TOP1		no	0.281384
chr13:99238427-99244624	185	yes	ENSG00000134882.15	UBAC2		no	0.582652
chr17:67945409-67948306	185	yes	ENSG00000171634.16	BPTF		no	0.358339
chr10:97436417-97437750	185	no				no
chr5:171183171-171205612	185	no				no
chr3:107710452-107716849	184	yes	ENSG00000114439.18	BBX		yes	0.0352095	ENST00000485939.5
chr3:56566594-56567053	184	yes	ENSG00000180376.16	CCDC66		no	0.213043
chr1:224952670-225007544	184	yes	ENSG00000185842.14	DNAH14		yes	0.2291
chr10:7243558-7285954	184	yes	ENSG00000198879.11	SFMBT2		no	0.198925
chr9:75016268-75017448	183	yes	ENSG00000156017.12	C9orf41		no	0.273734
chr5:77463095-77464809	183	yes	ENSG00000164253.12	WDR41		no	0.105784	ENST00000511791.1
chr7:127373342-127377329	182	yes	ENSG00000048405.9	ZNF800		no	0.31531
chr17:62033787-62035608	182	yes	ENSG00000108510.9	MED13		no	0.326166
chr13:100257595-100273346	182	yes	ENSG00000175198.14	PCCA		no	0.611032
chr4:150735258-150808398	182	yes	ENSG00000198589.10	LRBA		no	0.132522
chr17:45475100-45475726	182	yes	ENSG00000225190.8	PLEKHM1		no	0.194113	ENST00000582119.5
chr18:62539681-62550460	181	yes	ENSG00000141664.9	ZCCHC2		yes	0.251599
chr10:34269657-34284245	181	yes	ENSG00000148498.15	PARD3		no	0.234176
chr5:180261684-180280608	180	yes	ENSG00000050748.17	MAPK9		yes	0.430882
chr2:226864604-226914351	180	yes	ENSG00000144468.16	RHBDD1		yes	0.439794
chr21:37420299-37472880	179	yes	ENSG00000157540.19	DYRK1A		yes	0.0700103
chr3:196806579-196812851	179	yes	ENSG00000180370.10	PAK2		no	0.179426
chr12:123586747-123590449	178	yes	ENSG00000086598.10	TMED2		yes	0.257338
chr22:38494630-38501280	178	yes	ENSG00000100201.18	DDX17		no	-0.0208452
chr10:101667886-101676436	178	yes	ENSG00000107829.13	FBXW4		no	0.329731
chr3:5174017-5174414	178	yes	ENSG00000134108.12	ARL8B		no	0.436683	ENST00000419534.2
chr9:37424845-37426654	178	yes	ENSG00000137106.17	GRHPR		no	0.391198	ENST00000491488.5
chr2:226864604-226867318	178	yes	ENSG00000144468.16	RHBDD1		yes	0.63265
chr3:134188837-134195182	178	yes	ENSG00000163785.12	RYK		no	0.295474
chr15:44331988-44338317	178	yes	ENSG00000166734.18	CASC4		no	0.553374
chr6:135039573-135042126	177	yes	ENSG00000112339.14	HBS1L		no	0.436726	ENST00000533274.5
chr7:158788004-158799072	177	yes	ENSG00000117868.15	ESYT2		no	0.561549
chrX:44524002-44527365	177	no				no
chr3:172251260-172262083	176	no	ENSG00000075420.12	FNDC3B		no
chr5:140440119-140449305	176	yes	ENSG00000131503.20	ANKHD1		no	-0.279624
chr20:2964272-2965202	176	yes	ENSG00000132670.20	PTPRA		yes	0.447744
chrX:53614534-53615835	175	yes	ENSG00000086758.15	HUWE1		no	0.0564439
chr1:13731000-13742157	175	yes	ENSG00000116731.22	PRDM2		no	0.0738895
chr4:128074460-128082305	175	yes	ENSG00000138709.17	LARP1B		yes	0.126089
chr17:49311312-49312042	175	yes	ENSG00000198740.8	ZNF652		no	0.172264
chr11:77683710-77693611	174	yes	ENSG00000048649.13	RSF1		no	0.199061
chr22:24302195-24313466	174	yes	ENSG00000100014.19	SPECC1L		yes	0.120745
chr18:9195551-9221999	174	yes	ENSG00000101745.15	ANKRD12		no	0.560639
chr1:15717893-15721388	174	yes	ENSG00000116786.11	PLEKHM2		no	0.48273
chr11:74789626-74817714	174	yes	ENSG00000166439.5	RNF169		no	0.128973
chr3:101671130-101672213	173	yes	ENSG00000066422.4	ZBTB11		no	0.412598
chr4:139125164-139139497	173	yes	ENSG00000109381.19	ELF2		yes	0.374218
chr5:109713520-109716264	173	yes	ENSG00000112893.9	MAN2A1		no	0.258125
chr6:7176655-7189322	173	yes	ENSG00000124782.19	RREB1		yes	-0.0605287
chr3:57242856-57248351	173	yes	ENSG00000157500.10	APPL1		no	0.23088
chr14:30935163-30956242	173	yes	ENSG00000196792.11	STRN3		no	0.0984535
chr4:165219934-165263359	172	yes	ENSG00000109466.13	KLHL2		yes	0.48119
chr1:20757166-20773610	172	yes	ENSG00000127483.17	HP1BP3		yes	0.274763
chr4:53414615-53428183	172	yes	ENSG00000145216.15	FIP1L1		no	-0.165826
chr18:46946057-46946923	172	yes	ENSG00000167216.16	KATNAL2		yes	0.429366
chr18:47865059-47896809	172	yes	ENSG00000175387.15	SMAD2		yes	-0.00472914
chr14:30670256-30675065	171	yes	ENSG00000092108.20	SCFD1		no	0.246702
chr1:52493611-52509712	171	yes	ENSG00000134744.13	ZCCHC11		no	0.0924648
chr6:145888020-145894977	171	yes	ENSG00000146414.15	SHPRH		no	-0.0791843
chr8:130152736-130169067	171	yes	ENSG00000153317.14	ASAP1		no	0.0939054
chr21:39228500-39229436	171	yes	ENSG00000185658.13	BRWD1		no	-0.0412409
chr21:15014344-15043574	171	no	ENSG00000235609.7	AF127936.9		no
chr11:85996826-86003451	170	yes	ENSG00000073921.17	PICALM		no	0.340658
chr19:5047476-5082504	170	yes	ENSG00000127663.14	KDM4B		no	0.145438
chr2:190659158-190673152	170	yes	ENSG00000138386.16	NAB1		yes	0.440588
chr5:43161249-43161931	170	yes	ENSG00000172262.11	ZNF131		no	0.095896	ENST00000509931.5
chr3:67495798-67508903	170	yes	ENSG00000172340.14	SUCLG2		no	0.390892	ENST00000460567.5
chr15:44711514-44715563	170	no				yes
chr1:15534237-15536814	169	yes	ENSG00000116138.12	DNAJC16		no	0.278667
chr14:34586230-34609742	169	yes	ENSG00000129515.18	SNX6		yes	0.463306
chr9:33948374-33956146	169	yes	ENSG00000137073.20	UBAP2		no	0.33633	ENST00000539807.5
chr7:30550636-30574881	169	no	ENSG00000281039.1	RP4-777O23.3		no
chr7:156826605-156836885	168	yes	ENSG00000105983.19	LMBR1		no	0.303896
chr1:160323431-160332557	168	yes	ENSG00000122218.14	COPA		no	0.246964
chr2:189728660-189744788	168	yes	ENSG00000151687.14	ANKAR		no	-0.095834
chr7:27629371-27649633	167	yes	ENSG00000106049.8	HIBADH		no	0.324226
chr10:100923975-100926019	167	yes	ENSG00000119906.11	FAM178A		no	0.406157
chr2:108771701-108773046	167	yes	ENSG00000153201.15	RANBP2		no	0.092769
chr11:73707420-73720899	167	yes	ENSG00000175582.19	RAB6A		no	0.217013	ENST00000540771.5
chr14:24209885-24211851	167	no				yes
chr4:39326563-39327756	166	yes	ENSG00000035928.14	RFC1		no	0.562389
chr14:63998914-64022863	166	yes	ENSG00000054654.15	SYNE2		no	0.12914
chr5:57246300-57249576	166	yes	ENSG00000062194.15	GPBP1		yes	0.306348
chr22:20933779-20934244	166	yes	ENSG00000099942.12	CRKL		no	0.413285
chr2:37316237-37317179	166	yes	ENSG00000115825.9	PRKD3		yes	0.302273	ENST00000443187.1
chr12:69800209-69801721	166	yes	ENSG00000127328.21	RAB3IP		no	0.351533	ENST00000417413.7
chr2:229858772-229880128	166	yes	ENSG00000153827.13	TRIP12		yes	0.226605
chr17:18670867-18672302	166	no				no
chr1:51402435-51408332	165	yes	ENSG00000085832.16	EPS15		no	0.341759
chr11:89400017-89402542	165	yes	ENSG00000086991.12	NOX4		no	0.458283	ENST00000375979.7
chr3:179413412-179419505	165	yes	ENSG00000114450.9	GNB4		no	0.363337
chr2:99169550-99171429	165	yes	ENSG00000158411.10	MITD1		no	0.225074
chr1:59339958-59378837	165	yes	ENSG00000172456.16	FGGY		no	0.328651
chr12:47104113-47108164	165	no	ENSG00000179715.12	PCED1B		no
chr10:124942457-124943307	165	no	ENSG00000249456.1	RP11-298J20.4		yes
chr8:131940499-131946633	164	yes	ENSG00000132294.13	EFR3A		yes	0.128408
chr10:89751346-89762835	164	yes	ENSG00000138182.14	KIF20B		no	0.362722
chr19:12928342-12928847	164	yes	ENSG00000179115.10	FARSA		no	0.184506
chr10:20957731-20961779	164	no				no
chr6:122446916-122447180	164	no				no
chr11:96091892-96093517	163	yes	ENSG00000184384.13	MAML2		no	0.696427
chr12:123498544-123499536	163	yes	ENSG00000188026.11	RILPL1		no	0.419267
chr22:50372020-50394135	162	yes	ENSG00000100239.15	PPP6R2		yes	0.155676
chr14:91481576-91485730	162	yes	ENSG00000100796.17	SMEK1		no	0.238439	ENST00000555462.5
chr15:62007308-62013992	162	yes	ENSG00000129003.15	VPS13C		no	0.416755
chr1:113829592-113834439	162	yes	ENSG00000134242.15	PTPN22		no	0.322057	ENST00000460620.5
chr13:50927407-50949505	162	yes	ENSG00000136104.18	RNASEH2B		no	0.298515
chr3:141512163-141540609	162	yes	ENSG00000155903.11	RASA2		no	-0.0206017
chr3:158122103-158123991	162	yes	ENSG00000174891.12	RSRC1		yes	0.163397
chr7:92294889-92327900	161	yes	ENSG00000001629.9	ANKIB1		yes	0.391713
chr13:95983804-95999307	161	yes	ENSG00000102595.18	UGGT2		no	-0.0432133
chr10:11997672-12014184	161	yes	ENSG00000151461.19	UPF2		no	0.2398
chr3:47720666-47745993	161	yes	ENSG00000173473.10	SMARCC1		no	0.145364
chr16:3850297-3851009	160	yes	ENSG00000005339.12	CREBBP	yes	no	-0.220029
chr11:86022367-86031611	160	yes	ENSG00000073921.17	PICALM		yes	0.399295	ENST00000531558.1
chr13:60439688-60467379	160	yes	ENSG00000083544.13	TDRD3		yes	0.493813
chr1:35381259-35389082	160	yes	ENSG00000146463.11	ZMYM4		no	0.415832
chr8:61618978-61644632	160	yes	ENSG00000198363.15	ASPH		no	0.375258	ENST00000522349.5
chr2:120127688-120175000	159	no	ENSG00000115109.13	EPB41L5		no
chr1:20770930-20773610	159	yes	ENSG00000127483.17	HP1BP3		yes	0.0966109
chr3:3777725-3789074	159	yes	ENSG00000144455.13	SUMF1		no	0.377658
chr8:140879471-140890769	159	yes	ENSG00000169398.19	PTK2		yes	0.580021
chr2:109585126-109593119	159	yes	ENSG00000186522.14	2010-09-01		yes	0.416407	ENST00000493445.5
chr14:34862044-34862322	159	yes	ENSG00000198604.10	BAZ1A		no	0.090994
chr1:243415702-243426558	158	yes	ENSG00000054282.15	SDCCAG8		no	0.284669
chr18:58918271-58920633	158	yes	ENSG00000074657.13	ZNF532		yes	0.510689
chr4:51863437-51899378	158	yes	ENSG00000109184.14	DCUN1D4		no	0.10387
chr9:33960826-33989126	158	yes	ENSG00000137073.20	UBAP2		no	0.261895
chr1:66958059-66963160	158	yes	ENSG00000198160.14	MIER1		yes	0.0573382
chr12:111552280-111555919	158	yes	ENSG00000204842.14	ATXN2		yes	-0.152455	ENST00000549455.1
chr11:2951259-2979237	158	yes	ENSG00000205531.12	NAP1L4		yes	0.358812
chr11:70354301-70356254	157	yes	ENSG00000131626.15	PPFIA1		no	0.180877
chr12:94169153-94186473	157	yes	ENSG00000136040.8	PLXNC1		no	0.256275
chr1:167966629-167975015	157	yes	ENSG00000143164.15	DCAF6		no	0.25305
chr1:35381259-35390098	157	yes	ENSG00000146463.11	ZMYM4		no	0.367464
chr7:22976210-22991139	156	yes	ENSG00000122591.11	FAM126A		yes	0.267416
chr10:67966683-68014186	156	yes	ENSG00000148634.15	HERC4		no	0.137588
chr21:37108392-37132766	156	yes	ENSG00000182670.13	TTC3		yes	0.157872
chr5:10415488-10417404	155	yes	ENSG00000145495.14	2006-03-01		no	0.143922
chr4:87046166-87047594	155	yes	ENSG00000172493.20	AFF1		no	0.127226	ENST00000511722.5
chr17:64886086-64889752	155	yes	ENSG00000176809.10	LRRC37A3		yes	-0.140901	ENST00000580464.1
chr12:96323948-96334865	154	yes	ENSG00000059758.7	CDK17		yes	0.196106
chr2:62979188-62996766	154	yes	ENSG00000115504.14	EHBP1		no	0.249021
chr9:107300141-107325004	154	yes	ENSG00000119318.12	RAD23B		yes	0.326636
chr11:102362896-102368548	153	yes	ENSG00000110330.8	BIRC2		no	0.406315	ENST00000531259.5
chr1:243545510-243573048	153	yes	ENSG00000117020.16	AKT3		no	0.323735
chr11:72984088-72989097	153	yes	ENSG00000137478.14	FCHSD2		yes	0.50137
chr17:55031168-55047154	153	yes	ENSG00000166263.13	STXBP4		no	0.265665
chr9:125657651-125672643	152	yes	ENSG00000119487.16	MAPKAP1		yes	0.383071
chr1:211778918-211793190	152	yes	ENSG00000123684.12	LPGAT1		no	0.290507
chr7:77585543-77600806	152	yes	ENSG00000127947.15	PTPN12		yes	0.215918
chr9:33948374-33953474	152	yes	ENSG00000137073.20	UBAP2		no	0.360647	ENST00000539807.5
chr5:73058433-73077493	152	yes	ENSG00000157107.13	FCHO2		no	-0.0186863
chr5:36953618-36986301	152	yes	ENSG00000164190.16	NIPBL		yes	0.216833	ENST00000621733.1
chr2:238182065-238185287	151	yes	ENSG00000132323.8	ILKAP		no	0.349105
chr2:40428473-40430301	151	yes	ENSG00000183023.18	SLC8A1		yes	0.732021
chr12:1027748-1028572	150	yes	ENSG00000082805.19	ERC1		yes	0.718431
chr15:67231814-67236820	150	yes	ENSG00000103591.12	AAGAB		yes	0.237139
chr8:140585119-140605914	150	no	ENSG00000123908.11	AGO2		no
chr12:82857010-82857580	150	yes	ENSG00000179104.8	TMTC2		no	0.296807
chr10:5699525-5714207	150	no				no
chr10:104008177-104018908	149	yes	ENSG00000065613.13	SLK		no	0.437458
chr4:147857553-147881932	149	yes	ENSG00000071205.11	ARHGAP10		no	0.234263
chr8:101558419-101558812	149	yes	ENSG00000083307.10	GRHL2		no	0.388346
chr10:110596398-110598290	149	yes	ENSG00000108055.9	SMC3		no	0.302632
chr5:43675511-43704400	149	no	ENSG00000112992.16	NNT		no
chr20:34096657-34098633	149	yes	ENSG00000125977.6	EIF2S2		no	0.408968
chr2:176296860-176337577	149	no	ENSG00000128654.13	MTX2		no
chr2:210153495-210154611	149	yes	ENSG00000144445.15	KANSL1L		yes	0.0620822
chr17:59353215-59353526	149	yes	ENSG00000175155.8	YPEL2		yes	0.125807	ENST00000581865.1
chr3:175447229-175471758	149	yes	ENSG00000177694.14	NAALADL2		no	0.18968
chr4:139889357-139890967	149	yes	ENSG00000196782.12	MAML3		yes	0.430963	ENST00000502696.1
chr14:49586614-49586850	149	no				no
chr3:51541498-51590559	149	no				yes
chr11:77624963-77625818	148	yes	ENSG00000074201.8	CLNS1A		no	0.520236	ENST00000532069.5
chr2:61522611-61526521	148	yes	ENSG00000082898.16	XPO1		no	0.0838232
chr1:20749723-20773610	148	yes	ENSG00000127483.17	HP1BP3		yes	0.198491
chr12:100282943-100298175	148	yes	ENSG00000136021.17	SCYL2		yes	0.102839
chr1:219193082-219241308	148	no	ENSG00000143353.11	LYPLAL1		no
chr7:66240325-66286709	148	yes	ENSG00000169902.13	TPST1		yes	0.758643
chr3:8935871-8941804	147	yes	ENSG00000070950.9	RAD18		no	0.389179
chr15:44615363-44620403	147	yes	ENSG00000104133.14	SPG11		no	-0.0275155
chr8:130358017-130361771	147	yes	ENSG00000153317.14	ASAP1		yes	0.198377
chr18:8718424-8720496	147	yes	ENSG00000168502.17	MTCL1		yes	0.291812
chr8:47394978-47407961	147	no				no
chr5:132892164-132893118	146	yes	ENSG00000072364.12	AFF4		no	-0.0282295
chr15:60442416-60445791	146	no	ENSG00000128915.11	ICE2		no
chr6:144781922-144803147	146	yes	ENSG00000152818.18	UTRN		no	0.184251
chr2:168691034-168717978	146	yes	ENSG00000172292.14	CERS6		no	0.227362
chr7:80789306-80805758	145	yes	ENSG00000075223.13	SEMA3C		no	0.489231
chr8:115587001-115605002	145	yes	ENSG00000104447.11	TRPS1		no	0.218537
chr12:28225795-28259442	145	yes	ENSG00000123106.10	CCDC91		yes	0.357362	ENST00000544649.5
chr1:147275354-147285487	145	yes	ENSG00000131778.17	CHD1L		no	0.250049
chr9:14146689-14179780	145	yes	ENSG00000147862.14	NFIB		yes	0.454661
chr4:94573351-94585737	145	yes	ENSG00000163110.14	PDLIM5		no	0.31471
chr6:75621532-75634811	144	yes	ENSG00000112701.17	SENP6		no	0.226852
chr5:65567513-65572286	144	yes	ENSG00000113593.11	PPWD1		yes	0.483939
chr2:120073178-120078581	144	yes	ENSG00000115109.13	EPB41L5		no	0.00586484
chr6:16326394-16328470	144	yes	ENSG00000124788.17	ATXN1		yes	-0.0970553
chr7:66991137-66994341	144	yes	ENSG00000126524.9	SBDS		no	0.596559
chr2:213310059-213375119	144	yes	ENSG00000144451.18	SPAG16		no	0.863793
chr4:10097711-10103986	143	yes	ENSG00000071127.16	WDR1		no	0.657515	ENST00000502702.5
chr18:46890580-46903635	143	yes	ENSG00000078043.15	PIAS2		no	0.0434997	ENST00000545673.5
chr4:51863437-51886638	143	yes	ENSG00000109184.14	DCUN1D4		no	0.326419
chr9:33953285-33996333	143	yes	ENSG00000137073.20	UBAP2		no	0.240509
chr16:21962460-21976243	143	yes	ENSG00000140740.10	UQCRC2		no	0.521398
chr1:186406083-186419077	143	no	ENSG00000157181.14	C1orf27		no
chr2:121757240-121761524	143	yes	ENSG00000211460.11	TSN		no	0.414706	ENST00000498545.5
chr20:32316218-32316874	142	yes	ENSG00000101350.7	KIF3B		no	0.0473457
chr4:39913611-39925933	142	yes	ENSG00000121892.14	PDS5A		no	0.168459	ENST00000513798.1
chr7:151467144-151491013	142	no				yes
chr11:118786052-118786518	141	yes	ENSG00000110367.11	DDX6		yes	0.11693
chr5:80775694-80792844	141	yes	ENSG00000113318.9	MSH3		no	0.26077
chr3:183643480-183651276	141	yes	ENSG00000114796.15	KLHL24		yes	0.228774	ENST00000475827.5
chr1:155438327-155439068	141	yes	ENSG00000116539.10	ASH1L		no	-0.192044
chr20:2947982-2965202	141	yes	ENSG00000132670.20	PTPRA		yes	0.489008
chr7:139398599-139409654	141	yes	ENSG00000146963.17	C7orf55-LUC7L2		no	-0.11501
chr10:7276892-7285954	141	yes	ENSG00000198879.11	SFMBT2		no	0.185431
chr12:111509549-111510582	141	yes	ENSG00000204842.14	ATXN2		no	-0.0231409
chr8:127890589-127890998	141	yes	ENSG00000249859.7	PVT1		no	-0.000509383	ENST00000517525.1
chr17:36952886-36953907	141	yes	ENSG00000275700.4	AATF		no	0.389487
chr8:73673107-73688813	140	yes	ENSG00000040341.17	STAU2		yes	0.227059	ENST00000523558.5
chr20:21365421-21368590	140	yes	ENSG00000088930.7	XRN2		no	0.498209
chr12:28305649-28391411	140	yes	ENSG00000123106.10	CCDC91		no	0.386876	ENST00000536154.5
chr19:34430576-34438766	140	yes	ENSG00000126261.12	UBA2		yes	0.456291
chr9:110972073-110973558	140	yes	ENSG00000198121.13	LPAR1		yes	0.436321
chrX:131749306-131794466	140	yes	ENSG00000213468.3	FIRRE		no	0.822464
chr1:155395459-155459898	139	yes	ENSG00000116539.10	ASH1L		no	-0.0808846
chr18:76849526-76881512	139	yes	ENSG00000130856.15	ZNF236		no	0.0318269
chr5:64788951-64804386	139	yes	ENSG00000153015.15	CWC27		no	0.411289
chr3:170145423-170149244	139	yes	ENSG00000173889.15	PHC3		no	0.00802194	ENST00000466189.5
chr1:25340474-25343073	139	yes	ENSG00000183726.10	TMEM50A		yes	0.285293	ENST00000491936.5
chr5:171183195-171205612	139	yes	ENSG00000204764.12	RANBP17		no	0.277536
chr11:65499045-65499269	139	no				no
chr19:12524796-12528696	139	no				no
chr6:87210451-87218731	139	no				no
chr5:109713520-109729513	138	yes	ENSG00000112893.9	MAN2A1		no	0.116216
chr1:236806144-236816543	138	yes	ENSG00000116984.12	MTR		no	-0.0175104
chr1:155926676-155927156	138	yes	ENSG00000132680.10	KIAA0907		no	-0.110804
chr8:18765449-18804898	138	yes	ENSG00000156011.16	PSD3		no	0.504957
chrX:17103718-17138961	138	yes	ENSG00000169891.17	REPS2		no	0.683339
chr3:170171373-170178938	138	yes	ENSG00000173889.15	PHC3		yes	-0.0209448
chr8:67105905-67116122	137	yes	ENSG00000104218.13	CSPP1		no	0.0282655
chr9:83677727-83678599	137	yes	ENSG00000135018.13	UBQLN1		no	0.390033
chr7:22291175-22318037	137	yes	ENSG00000136237.18	RAPGEF5		yes	0.273677
chr17:82563354-82568201	137	yes	ENSG00000141568.19	FOXK2		no	0.385704
chr2:72718103-72731245	137	yes	ENSG00000144036.14	EXOC6B		no	0.168441
chr11:61366045-61367998	137	yes	ENSG00000149483.11	TMEM138		yes	0.106944
chr10:49932100-49935142	137	yes	ENSG00000227345.8	PARG		no	0.368667	ENST00000610922.1
chr17:7906066-7906310	137	no				no
chr6:13639563-13644729	136	yes	ENSG00000010017.12	RANBP9		no	0.327289
chr15:85113873-85115487	136	yes	ENSG00000073417.14	PDE8A		no	0.108814
chr14:50150008-50150230	136	yes	ENSG00000100485.11	SOS2		no	0.0550193
chr9:33953285-33963791	136	yes	ENSG00000137073.20	UBAP2		no	0.208883	ENST00000539807.5
chr10:37218980-37242847	136	no	ENSG00000148513.17	ANKRD30A		no
chr3:31576396-31580096	136	yes	ENSG00000163527.9	STT3B		no	0.0742988
chr11:65499651-65499949	136	no				no
chr4:173384651-173403950	136	no				yes
chr11:77619606-77629899	135	yes	ENSG00000074201.8	CLNS1A		no	0.621897
chr5:38523419-38530666	135	yes	ENSG00000113594.9	LIFR		yes	0.287374
chr9:83679775-83686155	135	yes	ENSG00000135018.13	UBQLN1		no	0.517552	ENST00000529923.1
chr10:93381219-93389154	135	yes	ENSG00000138119.16	MYOF		no	0.206427
chr10:37141718-37142290	135	yes	ENSG00000148513.17	ANKRD30A		no	0.337694
chr10:126970702-127257429	135	yes	ENSG00000150760.12	DOCK1		yes	0.658832
chr8:140846260-140890769	135	yes	ENSG00000169398.19	PTK2		yes	0.540831
chr6:87215903-87218731	135	yes	ENSG00000188994.12	ZNF292		no	0.222313	ENST00000518845.1
chr5:131677703-131709272	135	yes	ENSG00000217128.11	FNIP1		yes	-0.0496999
chr19:46918488-46937408	135	no				yes
chr4:87981672-87982605	135	no				no
chr12:108652272-108654410	134	yes	ENSG00000110880.10	CORO1C		no	0.407123	ENST00000549384.5
chr20:58438945-58441083	134	yes	ENSG00000124164.15	VAPB		no	0.184459	ENST00000395802.7
chr7:24623666-24650712	133	yes	ENSG00000105926.15	MPP6		yes	0.387346
chr1:243613671-243843282	133	yes	ENSG00000117020.16	AKT3		yes	0.735487
chr13:42917541-42970670	133	yes	ENSG00000133106.14	EPSTI1		no	0.436462
chr18:9583117-9595153	133	yes	ENSG00000154845.15	PPP4R1		no	0.43438
chr22:27894555-27914347	133	yes	ENSG00000180957.17	PITPNB		no	0.121249
chr18:54271360-54284013	132	yes	ENSG00000101751.10	POLI		yes	0.24968
chr17:4282798-4296814	132	yes	ENSG00000132388.12	UBE2G1		yes	0.0783177
chr11:46076754-46084302	132	yes	ENSG00000135365.15	PHF21A		yes	-0.172252
chr2:108752998-108753563	132	yes	ENSG00000153201.15	RANBP2		no	0.22637
chr21:37108392-37147603	132	yes	ENSG00000182670.13	TTC3		yes	0.404591
chr10:7367649-7381949	132	yes	ENSG00000198879.11	SFMBT2		yes	0.18272
chr7:16258390-16278226	132	yes	ENSG00000214960.9	ISPD		no	0.347615
chr1:13773078-13782831	131	yes	ENSG00000116731.22	PRDM2		yes	0.370969	ENST00000376048.9
chr2:23823258-23823569	131	yes	ENSG00000119778.14	ATAD2B		no	0.0080216
chr13:112516440-112527484	131	yes	ENSG00000126216.12	TUBGCP3		no	0.250268
chr5:179705679-179710065	131	yes	ENSG00000127022.14	CANX		yes	0.168746
chr8:132622611-132661627	131	yes	ENSG00000129295.8	LRRC6		no	0.428831
chr15:100330889-100334180	131	no	ENSG00000140470.13	ADAMTS17		no
chr1:230954333-230961303	131	yes	ENSG00000143643.12	TTC13		no	0.139585
chr8:47284028-47294030	131	yes	ENSG00000164808.16	SPIDR		no	0.101309
chr19:29985223-29986417	130	yes	ENSG00000105176.17	URI1		no	0.533106
chr4:53425872-53444103	130	yes	ENSG00000145216.15	FIP1L1		no	-0.144664
chr10:37231461-37242847	130	no	ENSG00000148513.17	ANKRD30A		no
chr21:15833348-15842540	130	yes	ENSG00000155313.15	USP25		no	0.188915	ENST00000351097.9
chr1:9931891-9935627	130	yes	ENSG00000162441.11	LZIC		no	0.337481
chr1:59321536-59346398	130	yes	ENSG00000172456.16	FGGY		yes	0.427504
chr14:71413948-71529370	130	yes	ENSG00000197555.9	SIPA1L1		no	0.271729
chrX:150793691-150816078	129	yes	ENSG00000102181.19	CD99L2		no	0.384079
chr7:24623666-24680520	129	yes	ENSG00000105926.15	MPP6		yes	0.507516
chr12:122340753-122341697	129	yes	ENSG00000130779.19	CLIP1		no	0.301703
chr16:69370483-69372355	129	yes	ENSG00000132604.10	TERF2		no	0.347218	ENST00000569542.6
chr1:30992390-30995220	129	yes	ENSG00000134644.15	PUM1		no	-0.030597	ENST00000526215.5
chr8:116655856-116658980	129	yes	ENSG00000147677.10	EIF3H		no	0.560112
chr3:33684359-33696933	129	yes	ENSG00000163539.15	CLASP2		no	0.0788625
chr4:127921524-127939997	129	yes	ENSG00000164073.9	MFSD8		no	0.0105649
chr3:93995874-94003908	129	yes	ENSG00000169379.15	ARL13B		yes	0.148956	ENST00000303097.11
chr7:100812747-100813208	129	yes	ENSG00000196411.9	EPHB4		no	0.227197
chr1:247157000-247159813	129	no				no
chr7:105073619-105078963	128	yes	ENSG00000005483.19	KMT2E		no	0.18365
chr13:60439688-60460540	128	yes	ENSG00000083544.13	TDRD3		yes	0.346105
chr10:48401612-48410168	128	yes	ENSG00000107643.15	MAPK8		yes	0.101502
chr9:122280443-122291840	128	yes	ENSG00000148187.17	MRRF		no	0.22488
chr16:58559804-58560362	128	no				no
chr14:75046376-75049718	127	yes	ENSG00000119684.15	MLH3		yes	0.406949
chr7:35667434-35673278	127	yes	ENSG00000122557.9	HERPUD2		no	0.430243
chr13:46723221-46733998	127	yes	ENSG00000136141.14	LRCH1		no	0.237516
chr4:90308244-90313047	127	yes	ENSG00000184305.14	CCSER1		yes	0.152413
chr10:28583399-28596041	126	yes	ENSG00000095787.21	WAC		no	0.275492
chr4:139116649-139139497	126	yes	ENSG00000109381.19	ELF2		yes	0.445778
chr3:71015549-71053773	126	yes	ENSG00000114861.18	FOXP1	yes	yes	0.278877
chr7:66127704-66134374	126	yes	ENSG00000249319.2	AC068533.7		no	0.203425	ENST00000398684.6
chr1:113848540-113855049	125	yes	ENSG00000134242.15	PTPN22		no	0.514432	ENST00000460620.5
chr14:91797785-91802421	125	yes	ENSG00000165929.12	TC2N		no	0.194625
chr2:112299849-112332282	125	yes	ENSG00000188177.13	ZC3H6		no	0.210617
chr2:178535732-178542361	125	yes	ENSG00000237298.8	TTN-AS1		no	-0.188648	ENST00000628296.2
chr5:13911386-13931244	124	yes	ENSG00000039139.9	DNAH5		no	0.177979
chr9:93471141-93476338	124	yes	ENSG00000048828.16	FAM120A		no	0.0275243
chr17:47618350-47619164	124	yes	ENSG00000141279.15	NPEPPS		no	-0.110295
chr9:37126312-37127263	124	no	ENSG00000147905.17	ZCCHC7		yes
chr4:3086939-3107423	124	yes	ENSG00000197386.10	HTT		no	-0.0336401
chr2:99186177-99195756	124	yes	ENSG00000241962.9	C2orf15		yes	-0.285019
chr20:62139075-62140944	123	yes	ENSG00000101182.14	PSMA7		yes	0.575996
chr3:119500695-119513719	123	yes	ENSG00000113845.9	TIMMDC1		no	0.475988	ENST00000493694.1
chr9:96458379-96465778	123	yes	ENSG00000130956.13	HABP4		no	0.279465
chr21:33432177-33432871	123	yes	ENSG00000159128.14	IFNGR2		no	0.496246
chr10:4830675-4909606	123	no	ENSG00000165568.17	AKR1E2		no
chr10:101792839-101810314	123	yes	ENSG00000198408.13	MGEA5		no	0.0731073
chr16:46674314-46677398	122	yes	ENSG00000069329.15	VPS35		no	0.27652
chr7:24623663-24668660	122	yes	ENSG00000105926.15	MPP6		yes	0.48041
chr15:58886975-58887540	122	yes	ENSG00000137776.16	SLTM		no	0.173965
chr2:23958301-23984831	122	yes	ENSG00000173960.12	UBXN2A		yes	0.294297
chr1:42265115-42278672	122	yes	ENSG00000198815.8	FOXJ3		no	0.103827
chr10:5773842-5800705	121	yes	ENSG00000057608.16	GDI2		no	0.570904
chr1:21715389-21721764	121	yes	ENSG00000090686.15	USP48		no	-0.0320209
chr1:155415744-155459898	121	yes	ENSG00000116539.10	ASH1L		no	-0.0581817
chr1:52515891-52526373	121	yes	ENSG00000134744.13	ZCCHC11		yes	-0.0513833
chr5:79439010-79457018	121	yes	ENSG00000152413.14	HOMER1		no	0.421251	ENST00000535690.1
chr5:170878097-170896115	121	yes	ENSG00000204764.12	RANBP17		no	0.30241
chr1:231795242-231818517	121	no	ENSG00000270106.5	TSNAX-DISC1		no		ENST00000628350.2
chr16:53141179-53157541	121	no				yes
chr10:179994-249088	120	yes	ENSG00000015171.18	ZMYND11		yes	0.265643
chr16:53873786-53888951	120	yes	ENSG00000140718.18	FTO		yes	0.301417
chr10:15833630-15847943	120	yes	ENSG00000148481.13	FAM188A		no	0.237593
chr11:65499774-65500010	120	no				no
chr10:96544076-96576829	119	yes	ENSG00000077147.14	TM9SF3		no	0.17426
chr15:76274412-76295737	119	yes	ENSG00000140374.15	ETFA		yes	0.583459
chr8:37877109-37877551	119	yes	ENSG00000156675.15	RAB11FIP1		yes	0.709117
chr1:197642711-197658369	119	yes	ENSG00000213047.11	DENND1B		no	0.756797
chr10:45939361-45965855	119	no				no
chr9:34681486-34681981	119	no				no
chr7:105090009-105091314	118	yes	ENSG00000005483.19	KMT2E		no	-0.112452
chr3:149846011-149912083	118	yes	ENSG00000082996.19	RNF13		yes	0.48105
chr9:123757703-123879021	118	yes	ENSG00000119522.15	DENND1A		yes	-0.0264966
chr4:77773081-77776392	118	yes	ENSG00000138767.12	CNOT6L		no	0.147038
chr21:37420299-37430400	118	yes	ENSG00000157540.19	DYRK1A		yes	-0.0280059	ENST00000462274.1
chrX:19965044-19970298	118	yes	ENSG00000173681.16	CXorf23		yes	0.266146
chr1:211353239-211354467	117	yes	ENSG00000082512.14	TRAF5		yes	-0.0656299
chr14:55612019-55619312	117	yes	ENSG00000126777.17	KTN1		yes	0.347262	ENST00000554567.1
chr2:214767482-214797117	117	yes	ENSG00000138376.10	BARD1		no	0.272465	ENST00000613374.4
chr1:153665220-153668557	117	yes	ENSG00000143621.16	ILF2		yes	0.516555
chr2:110161603-110163135	117	yes	ENSG00000144061.12	NPHP1		no	0.263508
chr2:175970764-175995646	117	yes	ENSG00000144320.13	KIAA1715		yes	0.42448
chrX:148661908-148662768	117	yes	ENSG00000155966.13	AFF2		no	0.625676
chr11:108046270-108054955	117	yes	ENSG00000166266.13	CUL5		no	0.146439
chr1:7777160-7778169	116	yes	ENSG00000049245.12	VAMP3		yes	0.351561
chr8:67251299-67259926	116	yes	ENSG00000066777.8	ARFGEF1		no	0.0334011
chr6:130955105-130956499	116	yes	ENSG00000079819.16	EPB41L2		yes	0.389138	ENST00000530148.5
chr2:61485768-61490776	116	yes	ENSG00000082898.16	XPO1		no	0.244216
chr10:13127745-13136897	116	no	ENSG00000123240.16	OPTN		no
chr4:109491327-109494856	116	yes	ENSG00000138802.11	SEC24B		no	0.317954
chr1:154234591-154235291	116	yes	ENSG00000143569.18	UBAP2L		no	-0.108358
chr3:119863419-119905852	115	yes	ENSG00000082701.14	GSK3B		no	0.0123088
chr11:89421902-89451895	115	yes	ENSG00000086991.12	NOX4		yes	0.537418	ENST00000375979.7
chr14:80497469-80530886	115	yes	ENSG00000100629.16	CEP128		no	0.105477
chr1:112653598-112659779	115	yes	ENSG00000116489.12	CAPZA1		no	0.392964
chr20:49092046-49094963	115	yes	ENSG00000124207.16	CSE1L		no	0.394802
chr2:213310059-213364145	115	yes	ENSG00000144451.18	SPAG16		no	0.704715
chr5:72989427-72990864	115	yes	ENSG00000157107.13	FCHO2		no	0.160312
chr1:59321536-59378837	115	yes	ENSG00000172456.16	FGGY		yes	0.292763
chr2:168161787-168182090	115	yes	ENSG00000198648.10	STK39		no	0.544526
chr7:74705164-74718941	115	yes	ENSG00000263001.5	GTF2I		no	-0.025385
chrX:132281095-132283032	115	no				no
chr14:91481576-91490802	114	yes	ENSG00000100796.17	SMEK1		no	0.227184
chr18:9931810-9937066	114	yes	ENSG00000101558.13	VAPA		no	0.215928
chr17:19958014-19958571	114	yes	ENSG00000108599.14	AKAP10		no	0.0836865
chr15:44328685-44380976	114	yes	ENSG00000166734.18	CASC4		no	0.212169
chr3:196806579-196807914	114	yes	ENSG00000180370.10	PAK2		no	0.241662
chr5:171391305-171392978	114	yes	ENSG00000181163.13	NPM1		no	0.536874
chr6:116698704-116705160	114	yes	ENSG00000196911.9	KPNA5		no	0.493436
chr2:168012634-168017095	114	yes	ENSG00000198648.10	STK39		no	0.427964
chr17:59731421-59773885	113	yes	ENSG00000062716.10	VMP1		yes	0.654689
chr1:51827796-51834170	113	yes	ENSG00000078618.19	NRD1		no	0.108406
chr14:22909483-22911403	113	yes	ENSG00000100461.17	RBM23		yes	0.130355	ENST00000555209.5
chr11:119284969-119285566	113	yes	ENSG00000110395.4	CBL		no	0.243039
chr12:70278132-70311017	113	yes	ENSG00000111596.11	CNOT2		yes	-0.011867
chr2:61370321-61395233	113	yes	ENSG00000115464.14	USP34		no	-0.0290971
chr18:54159765-54205157	113	yes	ENSG00000134046.11	MBD2		no	0.270942
chr8:60741259-60743097	113	yes	ENSG00000171316.11	CHD7		yes	0.0692616
chr1:50567077-50596216	113	yes	ENSG00000185104.19	FAF1		no	0.576666
chr3:197814908-197820430	113	yes	ENSG00000186001.12	LRCH3		no	0.0166799	ENST00000441090.6
chr6:34606555-34646798	113	yes	ENSG00000196821.9	C6orf106		no	0.374794
chr2:119926598-119945240	112	yes	ENSG00000088179.8	PTPN4		no	0.173605
chr18:21765772-21779685	112	yes	ENSG00000101752.11	MIB1		no	0.138124
chr18:22989221-23001729	112	yes	ENSG00000101773.16	RBBP8		no	0.776636
chr7:116110708-116112038	112	yes	ENSG00000105967.15	TFEC		yes	0.431115
chr5:16779545-16783469	112	yes	ENSG00000145555.14	MYO10		no	0.170226
chr19:12517745-12528696	112	no				no
chr17:42727635-42730918	111	yes	ENSG00000108799.12	EZH1		yes	-0.259881
chr3:119500695-119517315	111	yes	ENSG00000113845.9	TIMMDC1		no	0.333937
chr7:130120749-130122202	111	yes	ENSG00000128607.13	KLHDC10		no	0.17569
chr5:61472681-61473037	111	yes	ENSG00000130449.5	ZSWIM6		no	0.149074
chr21:34834410-34859578	111	yes	ENSG00000159216.18	RUNX1	yes	no	-0.0192059
chrX:80707427-80719656	111	yes	ENSG00000165288.10	BRWD3		no	-0.0358666
chr8:51831444-51861246	111	yes	ENSG00000168300.13	PCMTD1		yes	0.291221
chr2:48328561-48346751	111	yes	ENSG00000170802.15	FOXN2		yes	0.28314
chr2:173954873-173956232	111	yes	ENSG00000172845.13	SP3		no	0.341615
chr17:7499039-7499491	111	yes	ENSG00000181222.14	POLR2A		no	0.276362
chr3:37275756-37276012	111	no				no
chr6:151842597-151880771	110	yes	ENSG00000091831.21	ESR1	yes	yes	0.679159	ENST00000406599.5
chr14:22906195-22911403	110	yes	ENSG00000100461.17	RBM23		yes	0.26814
chr13:20051433-20067390	110	yes	ENSG00000121741.16	ZMYM2		no	0.0862908
chr13:102622877-102627924	110	yes	ENSG00000134900.11	TPP2		no	0.195324
chr4:105424196-105456745	110	yes	ENSG00000138777.19	PPA2		no	0.224193	ENST00000354147.7
chr6:79042843-79060818	110	yes	ENSG00000146247.13	PHIP		no	-0.0511803
chr3:114350274-114351878	110	yes	ENSG00000181722.15	ZBTB20		yes	0.0890698	ENST00000479879.5
chr5:137952628-137954376	109	yes	ENSG00000031003.10	FAM13B		no	0.217301
chr1:243293091-243426558	109	yes	ENSG00000054282.15	SDCCAG8		no	0.388522
chr8:17972329-17972687	109	yes	ENSG00000078674.17	PCM1		no	0.312971
chr3:149846011-149872154	109	yes	ENSG00000082996.19	RNF13		yes	0.616962
chr8:60572046-60591969	109	yes	ENSG00000104388.14	RAB2A		no	0.339779
chr7:10982372-10990847	109	yes	ENSG00000106443.14	PHF14		no	0.450653
chr1:44308310-44339322	109	yes	ENSG00000117419.14	ERI3		yes	0.7521
chr9:33960826-33996333	109	yes	ENSG00000137073.20	UBAP2		no	0.121906
chr4:107682015-107694006	109	yes	ENSG00000138801.8	PAPSS1		no	0.64768
chr10:7220411-7285954	109	yes	ENSG00000198879.11	SFMBT2		no	0.146763
chr2:24135119-24147086	109	yes	ENSG00000219626.8	FAM228B		yes	0.101771
chr12:97492461-97561047	109	yes	ENSG00000255794.6	RMST		no	0.613785
chr1:23030469-23059167	108	yes	ENSG00000004487.15	KDM1A		no	0.0375827
chr7:158773341-158799072	108	yes	ENSG00000117868.15	ESYT2		no	0.323479
chr11:34090179-34092056	108	yes	ENSG00000135387.19	CAPRIN1		no	0.246741	ENST00000528856.5
chr1:180003174-180006567	108	yes	ENSG00000135837.15	CEP350		no	0.0144415
chr2:135769769-135772547	108	yes	ENSG00000144224.16	UBXN4		no	0.321505
chr1:117402186-117466427	108	yes	ENSG00000198162.12	MAN1A2		no	0.316226
chr7:102757854-102761411	108	yes	ENSG00000222011.8	FAM185A		no	-0.0729572
chr14:20343081-20343292	108	no				no
chr7:43639449-43640649	107	yes	ENSG00000106603.17	COA1		no	0.127444
chr4:177353308-177360677	107	yes	ENSG00000109674.3	NEIL3		no	0.590506
chr8:70159505-70162854	107	yes	ENSG00000140396.12	NCOA2		no	-0.0556918
chr4:145823422-145849561	107	yes	ENSG00000151612.15	ZNF827		no	0.0205822
chr11:35201082-35204640	106	yes	ENSG00000026508.16	CD44		no	0.392069	ENST00000433892.6
chr4:147939825-147966839	106	yes	ENSG00000071205.11	ARHGAP10		no	0.30743
chr4:39737420-39777810	106	yes	ENSG00000078140.13	UBE2K		no	0.106918
chr12:12519862-12521463	106	yes	ENSG00000111266.8	DUSP16		yes	0.535538
chr12:69251129-69262562	106	yes	ENSG00000111605.16	CPSF6		no	0.271687
chr6:89083753-89084643	106	no	ENSG00000146278.10	PNRC1		yes
chrX:135545423-135556300	106	yes	ENSG00000165359.14	DDX26B		no	0.135222
chr7:66240325-66241270	106	yes	ENSG00000169902.13	TPST1		yes	0.577053	ENST00000480281.5
chr18:32111754-32124845	106	no	ENSG00000263917.1	RP11-53I6.2		no
chr6:158267234-158314268	106	no				yes
chr16:30483827-30484263	105	yes	ENSG00000005844.17	ITGAL		no	0.219063	ENST00000568926.5
chr7:140046884-140058034	105	yes	ENSG00000059378.12	PARP12		no	0.304147
chr18:9208657-9221999	105	yes	ENSG00000101745.15	ANKRD12		no	0.371544
chr16:11894954-11896785	105	yes	ENSG00000103342.12	GSPT1		no	0.206558
chr20:47623911-47633636	105	yes	ENSG00000124151.18	NCOA3		no	0.229177
chr1:45640210-45642499	105	yes	ENSG00000159592.10	GPBP1L1		no	0.00702335
chr10:32451592-32481782	105	yes	ENSG00000216937.11	CCDC7		yes	0.168941
chr14:49862574-49862799	105	no				no
chr20:43043042-43047010	105	no				no
chr7:152263016-152315338	104	yes	ENSG00000055609.17	KMT2C		no	-0.268652
chr10:27532507-27533994	104	yes	ENSG00000099246.16	RAB18		no	0.248117
chr8:67131951-67137603	104	yes	ENSG00000104218.13	CSPP1		no	-0.071229
chr1:13731000-13749487	104	yes	ENSG00000116731.22	PRDM2		no	-0.0615611
chr15:101235082-101235577	104	yes	ENSG00000131873.5	CHSY1		no	0.418829
chr20:32366384-32371874	104	yes	ENSG00000171456.16	ASXL1	yes	yes	0.26385
chr1:223954477-223962273	104	no				no
chr7:150233035-150237608	104	no				no
chr2:58084089-58089723	103	yes	ENSG00000028116.16	VRK2		yes	0.39576
chr4:36228582-36229645	103	yes	ENSG00000047365.11	ARAP2		yes	0.355846
chr2:45546732-45562756	103	yes	ENSG00000068784.12	SRBD1		no	0.0254586
chr7:17890363-17897446	103	yes	ENSG00000071189.21	SNX13		no	0.00638531
chr11:85974708-85983973	103	yes	ENSG00000073921.17	PICALM		no	0.103765
chr1:1815756-1839238	103	yes	ENSG00000078369.17	GNB1		yes	0.278839
chr15:42827928-42840433	103	yes	ENSG00000128881.16	TTBK2		no	-0.0914127
chr10:15816835-15847943	103	yes	ENSG00000148481.13	FAM188A		no	0.221538
chr4:143543509-143543972	103	yes	ENSG00000153147.5	SMARCA5		no	0.481485
chr8:134812610-134813169	103	no				no
chr10:124408542-124412200	102	yes	ENSG00000065154.11	OAT		yes	0.512458
chr2:61482957-61490776	102	yes	ENSG00000082898.16	XPO1		no	0.130641
chr7:6111125-6115523	102	yes	ENSG00000106346.11	USP42		yes	0.349669
chr15:76287846-76292700	102	yes	ENSG00000140374.15	ETFA		no	0.226519
chr2:15461201-15478289	102	yes	ENSG00000151779.12	NBAS		no	0.323656
chr5:38990949-39003622	102	yes	ENSG00000164327.12	RICTOR		no	0.000891862
chr3:47037666-47046621	102	yes	ENSG00000181555.19	SETD2	yes	no	0.108674
chr16:68121987-68123121	102	no	ENSG00000261864.1	RP11-67A1.2		no		ENST00000566893.5
chr8:668598-674047	101	yes	ENSG00000104714.13	ERICH1		no	0.300064
chr3:131162408-131170887	101	yes	ENSG00000114670.13	NEK11		no	0.345183
chr9:107300141-107306647	101	yes	ENSG00000119318.12	RAD23B		yes	0.48888
chr10:24380869-24384423	101	no	ENSG00000120549.15	KIAA1217		no
chr8:86368939-86381629	101	yes	ENSG00000123124.13	WWP1		yes	0.643853
chr12:68650400-68652051	101	yes	ENSG00000127314.17	RAP1B		no	0.0802424	ENST00000539091.5
chr1:10095461-10105744	101	yes	ENSG00000130939.18	UBE4B		no	0.161077
chr13:26400453-26401624	101	yes	ENSG00000132964.11	CDK8		no	0.23
chr22:33761371-33765953	101	no	ENSG00000133424.20	LARGE		yes
chr7:6814764-6823360	101	yes	ENSG00000146574.15	CCZ1B		no	0.161082
chr10:116089741-116096764	101	yes	ENSG00000151892.14	GFRA1		no	0.268582
chr18:44949881-44953340	101	yes	ENSG00000152217.16	SETBP1		no	0.528827
chr3:155829688-155834041	101	yes	ENSG00000169359.13	SLC33A1		no	0.328469
chr1:172555869-172570730	100	yes	ENSG00000094975.13	SUCO		no	0.0505997
chr3:138525490-138537347	100	yes	ENSG00000114107.8	CEP70		no	0.204477
chr2:73447960-73455295	100	yes	ENSG00000116127.17	ALMS1		no	0.352522
chr2:222900674-222909150	100	yes	ENSG00000123983.13	ACSL3		yes	0.0635376
chr11:59658866-59659469	100	yes	ENSG00000166889.13	PATL1		no	0.111241
chr2:68490190-68545312	100	yes	ENSG00000169621.9	APLF		no	0.444805
chr3:47037666-47067118	100	yes	ENSG00000181555.19	SETD2	yes	no	-0.111234
chr17:31155983-31182665	100	yes	ENSG00000196712.16	NF1	yes	no	-0.0488271
chr14:71413948-71418196	100	yes	ENSG00000197555.9	SIPA1L1		no	0.100517	ENST00000553453.5
chr11:65499795-65500010	100	no				no
chr5:79618647-79620083	100	no				yes
chr14:67269701-67303599	99	yes	ENSG00000072415.8	MPP5		yes	0.419029
chr14:30715924-30734858	99	yes	ENSG00000092108.20	SCFD1		no	0.140256
chr22:41125864-41140257	99	yes	ENSG00000100393.9	EP300		no	-0.172649
chr9:111578796-111586165	99	yes	ENSG00000106853.16	PTGR1		no	0.383561
chr6:100798713-100805880	99	yes	ENSG00000112249.13	ASCC3		no	0.219755
chr3:179203544-179204588	99	yes	ENSG00000121879.3	PIK3CA	yes	no	0.217613
chr13:46003139-46045516	99	yes	ENSG00000123200.16	ZC3H13		yes	0.631137
chr11:34071726-34076642	99	yes	ENSG00000135387.19	CAPRIN1		yes	-0.0962753	ENST00000528856.5
chr14:102194938-102209862	99	yes	ENSG00000140153.17	WDR20		no	0.18981
chr1:151638888-151668635	99	yes	ENSG00000143376.12	SNX27		no	0.0768997
chr9:37126312-37147445	99	yes	ENSG00000147905.17	ZCCHC7		yes	0.268109
chr2:207724800-207742342	99	yes	ENSG00000163249.9	CCNYL1		no	0.628191
chr4:40934456-40945070	99	yes	ENSG00000163697.16	APBB2		no	0.0956205
chr5:77046347-77048272	99	yes	ENSG00000164252.12	AGGF1		no	0.214424
chr8:47396376-47440542	99	yes	ENSG00000164808.16	SPIDR		no	0.0991815
chr1:58506060-58536741	99	no	ENSG00000173406.15	DAB1		no
chr1:225185291-225207220	99	yes	ENSG00000185842.14	DNAH14		no	0.168991
chr17:31155983-31169997	99	yes	ENSG00000196712.16	NF1	yes	no	0.031113
chr8:61680968-61684188	99	yes	ENSG00000198363.15	ASPH		no	0.500694	ENST00000522325.1
chr8:80499494-80500382	99	yes	ENSG00000205189.11	ZBTB10		no	0.307569
chr16:2253694-2253996	99	no				no
chr2:131553013-131582129	99	no				no
chr16:48277338-48303305	98	yes	ENSG00000102910.13	LONP2		no	0.422807
chr3:119503532-119517315	98	yes	ENSG00000113845.9	TIMMDC1		no	0.363066
chr8:22474954-22475624	98	yes	ENSG00000120910.14	PPP3CC		no	0.252367
chr6:110887505-110890356	98	yes	ENSG00000123505.14	AMD1		yes	0.563706	ENST00000368882.7
chr7:111935540-111945798	98	yes	ENSG00000128512.19	DOCK4		no	0.14467
chr18:2890561-2892486	98	yes	ENSG00000132205.10	EMILIN2		no	0.6475
chr10:68468123-68470163	98	yes	ENSG00000138346.14	DNA2		no	0.345978
chr8:70213903-70216764	98	yes	ENSG00000140396.12	NCOA2		yes	0.0409119
chr5:68226290-68227009	98	yes	ENSG00000145675.14	PIK3R1	yes	yes	0.381522
chr10:75219063-75219356	98	yes	ENSG00000165637.13	VDAC2		no	0.160845
chr3:174523413-174553757	98	no	ENSG00000177694.14	NAALADL2		no
chr19:52383849-52385742	98	no	ENSG00000221923.8	ZNF880		no
chr8:140347757-140360193	98	no				no
chr13:77205256-77243951	97	yes	ENSG00000005810.17	MYCBP2		no	-0.0114892
chr17:12054889-12113360	97	yes	ENSG00000065559.14	MAP2K4	yes	no	0.235285
chrX:53403566-53403893	97	yes	ENSG00000072501.17	SMC1A		no	0.0637608
chr6:89846562-89857199	97	yes	ENSG00000118412.12	CASP8AP2		yes	0.210054
chr1:32030298-32033334	97	yes	ENSG00000121774.17	KHDRBS1		no	0.163538
chr5:71592926-71604468	97	yes	ENSG00000131844.15	MCCC2		no	0.264837
chr1:233177802-233208689	97	yes	ENSG00000135749.18	PCNXL2		no	-0.0310214
chr1:215586495-215595471	97	yes	ENSG00000136636.12	KCTD3		no	0.734545
chr1:8495063-8614686	97	yes	ENSG00000142599.17	RERE		yes	0.079332
chr2:226906793-226914351	97	yes	ENSG00000144468.16	RHBDD1		no	0.348144
chr9:14120440-14179780	97	yes	ENSG00000147862.14	NFIB		yes	0.330525
chr5:55645789-55664863	97	yes	ENSG00000177058.11	SLC38A9		no	0.0195071
chr11:18291442-18292019	96	yes	ENSG00000110756.17	HPS5		no	0.246784	ENST00000544218.5
chr12:56666204-56670364	96	yes	ENSG00000110958.15	PTGES3		no	0.0688553
chr2:144208603-144211579	96	yes	ENSG00000121964.14	GTDC1		yes	0.277762	ENST00000463875.6
chr14:34575756-34609742	96	yes	ENSG00000129515.18	SNX6		yes	0.336771
chr18:49363161-49379758	96	yes	ENSG00000141627.13	DYM		yes	0.249487	ENST00000442713.6
chr3:152414941-152432920	96	yes	ENSG00000152601.17	MBNL1		no	0.335825
chr3:56660731-56673725	96	yes	ENSG00000163946.13	FAM208A		yes	0.297712
chr10:91425281-91462184	96	yes	ENSG00000165338.16	HECTD2		no	0.0953784
chr3:129827803-129832826	96	yes	ENSG00000172765.16	TMCC1		yes	0.109464
chrX:53987078-53987944	96	yes	ENSG00000172943.18	PHF8		no	0.113562
chr11:30337251-30337460	96	no				no
chr7:6463122-6466229	96	no				no
chr5:128138597-128152805	95	yes	ENSG00000064651.13	SLC12A2		no	0.29173
chr14:103753000-103754244	95	yes	ENSG00000088808.16	PPP1R13B		no	0.0286521	ENST00000556325.1
chr1:86715724-86724405	95	yes	ENSG00000097033.14	SH3GLB1		yes	0.399128
chr7:151470571-151491014	95	yes	ENSG00000106615.9	RHEB		yes	0.412838
chr12:56169529-56170208	95	yes	ENSG00000139613.11	SMARCC2		no	0.178876
chr4:184659340-184678394	95	yes	ENSG00000164306.10	PRIMPOL		yes	0.370484
chr11:120473050-120477526	95	yes	ENSG00000196914.8	ARHGEF12		no	0.30978
chr11:65499042-65499267	95	no	ENSG00000251562.7	MALAT1		no
chr8:528895-531576	95	no				no
chr7:8218305-8236005	94	yes	ENSG00000003147.17	ICA1		yes	0.46292	ENST00000486677.1
chr17:1361092-1362008	94	yes	ENSG00000108953.16	YWHAE		no	0.318209	ENST00000573196.5
chr4:142402938-142462726	94	yes	ENSG00000109452.12	INPP4B		yes	0.351566
chr1:24514314-24514567	94	yes	ENSG00000117602.11	RCAN3		yes	0.0829115	ENST00000618490.4
chr8:38114192-38121149	94	yes	ENSG00000129691.15	ASH2L		no	0.528575
chr4:95104408-95131512	94	yes	ENSG00000138696.10	BMPR1B		yes	0.313397
chr3:170122591-170129552	94	yes	ENSG00000173889.15	PHC3		no	0.141413
chr2:95851694-95860074	94	yes	ENSG00000174501.14	ANKRD36C		yes	0.000475436
chr2:112299849-112325197	94	yes	ENSG00000188177.13	ZC3H6		no	0.348508
chr2:206279540-206297373	94	yes	ENSG00000204186.7	ZDBF2		yes	0.611306
chr5:151673145-151686913	94	no				yes
chrX:48577838-48578166	94	no				no
chr13:32732101-32735330	93	yes	ENSG00000083642.18	PDS5B		no	0.411727
chr12:120154970-120155719	93	yes	ENSG00000089154.10	GCN1L1		no	0.211463
chr8:98526742-98596169	93	yes	ENSG00000104375.15	STK3		no	0.12131
chr2:215373322-215391814	93	yes	ENSG00000115414.18	FN1		no	0.217244
chr15:57437985-57442478	93	yes	ENSG00000128849.10	CGNL1		yes	0.317615
chr8:17743604-17755961	93	yes	ENSG00000129422.13	MTUS1		yes	0.761729
chr12:122377389-122380558	93	yes	ENSG00000130779.19	CLIP1		yes	-0.0592387
chr17:82763965-82781721	93	yes	ENSG00000141556.20	TBCD		no	0.200799
chr3:71690010-71699708	93	yes	ENSG00000163412.12	EIF4E3		yes	0.128434
chr5:69294793-69311204	93	yes	ENSG00000183323.12	CCDC125		yes	0.145703
chr11:63651936-63652575	93	yes	ENSG00000184743.12	ATL3		no	0.195658
chr16:8915254-8917156	93	yes	ENSG00000187555.14	USP7		no	0.234603
chr11:120475340-120477526	93	yes	ENSG00000196914.8	ARHGEF12		no	0.0390641
chr7:74705164-74716950	93	yes	ENSG00000263001.5	GTF2I		no	0.0813484
chr2:131575035-131613103	93	no				no
chr14:80831143-80840768	92	yes	ENSG00000100629.16	CEP128		no	0.234065
chr10:115120185-115129535	92	yes	ENSG00000107518.16	ATRNL1		no	0.606931
chr15:25405461-25415842	92	yes	ENSG00000114062.17	UBE3A		yes	-0.16517
chr1:41575544-41585318	92	yes	ENSG00000127124.13	HIVEP3		yes	0.389826
chr10:27117576-27121448	92	yes	ENSG00000136758.18	YME1L1		no	0.293753
chr18:21564203-21568094	92	yes	ENSG00000141446.10	ESCO1		no	0.0255758
chr4:169155480-169156679	92	yes	ENSG00000154447.14	SH3RF1		no	0.285523
chr2:23982896-23984831	92	yes	ENSG00000173960.12	UBXN2A		no	0.0673919
chr1:145839890-145841071	92	yes	ENSG00000186141.8	POLR3C		no	0.290864	ENST00000369294.5
chr10:50433476-50590247	92	yes	ENSG00000198964.13	SGMS1		no	0.156313
chr7:102227367-102227669	92	yes	ENSG00000257923.9	CUX1	yes	no	-0.00312995	ENST00000393824.7
chr6:42592151-42594304	91	yes	ENSG00000024048.10	UBR2		no	0.116855
chr4:147946617-147966839	91	yes	ENSG00000071205.11	ARHGAP10		no	0.300393
chr20:16370586-16381747	91	yes	ENSG00000089177.17	KIF16B		no	0.622234
chr1:21715389-21724095	91	yes	ENSG00000090686.15	USP48		no	0.0239098
chr22:45178238-45178900	91	yes	ENSG00000093000.18	NUP50		no	0.0864457	ENST00000493456.5
chr22:21805850-21807846	91	yes	ENSG00000100030.14	MAPK1		no	0.188518
chr9:4286038-4286523	91	yes	ENSG00000107249.21	GLIS3		yes	0.186565	ENST00000490709.1
chr12:46239679-46243314	91	yes	ENSG00000111371.15	SLC38A1		yes	0.0725714	ENST00000551506.1
chr2:214745067-214781509	91	yes	ENSG00000138376.10	BARD1		no	0.631471	ENST00000613192.1
chr5:71502599-71512428	91	yes	ENSG00000145734.18	BDP1		no	0.399519
chr8:140700891-140706205	91	yes	ENSG00000169398.19	PTK2		no	0.478044
chr15:77365163-77388802	91	no	ENSG00000173517.10	PEAK1		no
chr2:230357805-230361697	91	yes	ENSG00000185404.16	SP140L		yes	0.375033
chr17:49311312-49312845	91	yes	ENSG00000198740.8	ZNF652		no	0.323501
chr6:30650994-30651466	91	yes	ENSG00000204564.11	C6orf136		no	0.357324
chr3:49335020-49335596	91	no				no
chr1:40189055-40202614	90	yes	ENSG00000117000.8	RLF		no	0.456863
chr2:47822218-47823360	90	yes	ENSG00000138081.19	FBXO11		no	0.226881
chr15:75854386-75883424	90	yes	ENSG00000140367.11	UBE2Q2		no	0.505712
chr15:75859878-75873568	90	yes	ENSG00000140367.11	UBE2Q2		no	0.271193	ENST00000561723.5
chr8:37765526-37766355	90	yes	ENSG00000147471.11	PROSC		no	0.380801
chr19:21974729-21988909	90	yes	ENSG00000160321.14	ZNF208		yes	0.187034
chr2:31917926-31932135	90	yes	ENSG00000162959.13	MEMO1		no	-0.296921	ENST00000422936.5
chr3:63912588-63913225	90	yes	ENSG00000163635.17	ATXN7		yes	-0.321977
chr5:95763508-95783963	90	yes	ENSG00000164292.12	RHOBTB3		yes	0.460605
chr18:47865059-47870564	90	yes	ENSG00000175387.15	SMAD2		no	0.0880637
chr16:53254438-53274302	90	yes	ENSG00000177200.15	CHD9		yes	0.593033
chr6:31268943-31354063	90	no				yes
chr11:77624963-77629899	89	yes	ENSG00000074201.8	CLNS1A		no	0.547078
chr22:24302195-24369320	89	yes	ENSG00000100014.19	SPECC1L		yes	0.302218
chr9:111570091-111586165	89	yes	ENSG00000106853.16	PTGR1		no	0.516225
chr4:1900626-1935262	89	yes	ENSG00000109685.17	WHSC1		yes	0.243341
chr9:97994631-97998678	89	yes	ENSG00000136938.8	ANP32B		no	0.28624
chr2:135769769-135770735	89	yes	ENSG00000144224.16	UBXN4		no	0.446757
chr11:13413530-13445181	89	yes	ENSG00000148925.10	BTBD10		yes	0.526946
chr21:43746079-43749080	89	yes	ENSG00000160209.18	PDXK		no	0.311108
chr12:50427762-50441643	89	yes	ENSG00000161813.20	LARP4		yes	0.423892
chr17:31982999-31988497	89	yes	ENSG00000178691.10	SUZ12		no	0.242297
chr2:168129541-168140758	89	yes	ENSG00000198648.10	STK39		no	0.363587
chr6:31863555-31869637	89	no				no
chr5:180238332-180241155	88	yes	ENSG00000050748.17	MAPK9		no	0.121101
chr17:59737453-59817773	88	yes	ENSG00000062716.10	VMP1		no	0.673842
chr18:9204476-9221999	88	yes	ENSG00000101745.15	ANKRD12		no	0.44977
chr16:48256610-48277479	88	yes	ENSG00000102910.13	LONP2		no	0.447198
chr6:13579451-13584225	88	yes	ENSG00000124523.14	SIRT5		yes	0.151919
chr2:161179614-161204793	88	yes	ENSG00000136560.13	TANK		yes	0.243995
chr1:35413972-35415714	88	yes	ENSG00000146463.11	ZMYM4		no	0.239203
chr7:140776912-140794467	88	yes	ENSG00000157764.12	BRAF	yes	no	0.0270389
chr2:189006345-189007608	88	no	ENSG00000168542.12	COL3A1		no
chr9:95978061-96004701	88	yes	ENSG00000182150.15	ERCC6L2		no	0.0409719
chr7:100355143-100355804	88	no	ENSG00000272752.5	STAG3L5P-PVRIG2P-PILRB		no
chr11:65499651-65499858	88	no				no
chr14:105741657-105769552	88	no				no
chr3:47425485-47428670	87	yes	ENSG00000114650.18	SCAP		yes	0.56368	ENST00000545718.2
chr2:85368686-85371562	87	yes	ENSG00000115459.17	ELMOD3		no	0.158412
chr2:32414769-32416163	87	yes	ENSG00000115760.13	BIRC6		no	0.410051
chr19:34430576-34434968	87	yes	ENSG00000126261.12	UBA2		yes	0.34723
chr22:45700282-45740538	87	yes	ENSG00000130638.15	ATXN10		no	0.492675
chr3:128262128-128264781	87	yes	ENSG00000132394.10	EEFSEC		no	0.354453	ENST00000484438.1
chr15:63553715-63563008	87	yes	ENSG00000140455.16	USP3		no	-0.00280158	ENST00000559873.5
chr2:100006632-100011571	87	yes	ENSG00000144218.18	AFF3		no	0.274896
chr2:135748267-135772547	87	yes	ENSG00000144224.16	UBXN4		no	0.0707721
chr3:113488945-113506605	87	yes	ENSG00000163611.11	SPICE1		yes	0.0416597
chr15:92945821-92967513	87	yes	ENSG00000173575.18	CHD2		no	-0.0505106
chr3:195688533-195689438	87	yes	ENSG00000242086.8	LINC00969		no	-0.232162	ENST00000629990.1
chr12:120198621-120199001	87	no				no
chr2:135602500-135605016	86	yes	ENSG00000048991.16	R3HDM1		yes	-0.074787	ENST00000488035.5
chr17:12054889-12095694	86	yes	ENSG00000065559.14	MAP2K4	yes	no	0.614991
chr1:40267786-40272035	86	yes	ENSG00000084073.8	ZMPSTE24		no	0.160097
chr20:21339044-21344208	86	yes	ENSG00000088930.7	XRN2		no	0.359828
chr18:54277703-54287411	86	yes	ENSG00000101751.10	POLI		no	0.0376871
chr16:11894954-11898035	86	yes	ENSG00000103342.12	GSPT1		yes	0.0125942
chr6:163455279-163478896	86	yes	ENSG00000112531.16	QKI		no	0.263628
chr7:105142008-105143330	86	yes	ENSG00000135250.16	SRPK2		no	0.332697	ENST00000485455.1
chr1:233217899-233227371	86	yes	ENSG00000135749.18	PCNXL2		yes	-0.0750318
chr4:107682015-107701285	86	yes	ENSG00000138801.8	PAPSS1		no	0.668321
chr12:19462510-19473355	86	yes	ENSG00000139154.14	AEBP2		yes	0.411328
chr15:76283757-76292700	86	yes	ENSG00000140374.15	ETFA		no	0.107623
chr18:21366027-21403994	86	yes	ENSG00000141449.14	GREB1L		yes	0.285631
chr2:95148885-95153259	86	no	ENSG00000144029.11	MRPS5		yes
chr2:213310059-213350645	86	yes	ENSG00000144451.18	SPAG16		no	0.913533
chr4:53399730-53428183	86	yes	ENSG00000145216.15	FIP1L1		no	-0.15272
chr10:37218980-37219897	86	yes	ENSG00000148513.17	ANKRD30A		no	-0.0206348
chr11:108176246-108177090	86	yes	ENSG00000149308.16	NPAT		no	0.369499
chr6:144537582-144539443	86	yes	ENSG00000152818.18	UTRN		no	0.12444
chr5:126603570-126604183	86	yes	ENSG00000164902.13	PHAX		no	0.374434
chr3:168036836-168041474	86	yes	ENSG00000173905.8	GOLIM4		no	0.519561
chr10:124038515-124046724	86	yes	ENSG00000182022.17	CHST15		yes	0.267906
chr12:111552280-111554217	86	yes	ENSG00000204842.14	ATXN2		yes	-0.152687	ENST00000549455.1
chr21:8213889-8441312	86	no				no
chr3:51541498-51552063	86	no				no
chr12:56562417-56571855	85	yes	ENSG00000076067.11	RBMS2		yes	0.0682982
chr2:61482380-61490776	85	yes	ENSG00000082898.16	XPO1		no	0.170071
chr15:80098416-80122800	85	yes	ENSG00000086666.18	ZFAND6		yes	0.252571
chr10:5709530-5714207	85	yes	ENSG00000108021.19	FAM208B		no	0.157101
chr6:18249651-18258405	85	yes	ENSG00000124795.14	DEK		no	0.476222
chr20:10556231-10560820	85	yes	ENSG00000149346.14	SLX4IP		no	-0.0576395
chr4:128997874-129003876	85	yes	ENSG00000151466.11	SCLT1		no	0.197397	ENST00000439369.6
chr10:103347238-103348999	85	yes	ENSG00000156374.14	PCGF6		no	0.169345
chr8:140789474-140890769	85	yes	ENSG00000169398.19	PTK2		yes	0.501956
chr17:67891844-67894165	85	yes	ENSG00000171634.16	BPTF		no	0.421424
chr16:70565065-70567536	85	yes	ENSG00000189091.12	SF3B3		no	0.23433
chr19:58260851-58263676	85	no	ENSG00000198131.13	ZNF544		yes
chr3:3137260-3144710	84	yes	ENSG00000072756.16	TRNT1		no	0.0951451
chr14:103778745-103797518	84	yes	ENSG00000088808.16	PPP1R13B		no	0.204796	ENST00000556325.1
chr17:61984171-61985090	84	yes	ENSG00000108510.9	MED13		no	0.340379
chr3:107710452-107733023	84	yes	ENSG00000114439.18	BBX		yes	0.0598574	ENST00000485939.5
chr2:208345111-208348023	84	yes	ENSG00000115020.16	PIKFYVE		no	-0.149392
chr16:2557703-2566453	84	yes	ENSG00000140992.18	PDPK1		yes	0.186267
chr1:35470863-35479212	84	yes	ENSG00000142687.17	KIAA0319L		no	0.285443
chr1:151024611-151027327	84	yes	ENSG00000143363.15	PRUNE		yes	0.238467
chr6:116689320-116705160	84	yes	ENSG00000196911.9	KPNA5		no	0.243453
chr7:44802834-46964476	84	no				yes
chr7:105062164-105081797	83	yes	ENSG00000005483.19	KMT2E		yes	0.264168
chr6:13632370-13658832	83	yes	ENSG00000010017.12	RANBP9		no	0.269806
chrX:10063445-10067490	83	yes	ENSG00000047644.17	WWC3		yes	0.114866
chr1:77717867-77725762	83	yes	ENSG00000077254.14	USP33		no	0.661401
chr6:161034259-161049979	83	yes	ENSG00000085511.19	MAP3K4		no	0.3677	ENST00000542952.5
chr8:60584208-60591969	83	yes	ENSG00000104388.14	RAB2A		no	0.180321
chr11:68551121-68564432	83	yes	ENSG00000110075.14	PPP6R3		no	0.0403437	ENST00000534534.5
chr3:52737586-52741499	83	yes	ENSG00000114904.12	NEK4		no	0.323834
chr1:243545510-243843282	83	yes	ENSG00000117020.16	AKT3		yes	0.831221
chr5:140440119-140445975	83	yes	ENSG00000131503.20	ANKHD1		no	-0.207959
chr1:113834910-113855049	83	yes	ENSG00000134242.15	PTPN22		no	0.439583	ENST00000460620.5
chr9:85669485-85712566	83	yes	ENSG00000135049.15	AGTPBP1		yes	0.343799
chr14:37680151-37701526	83	yes	ENSG00000139865.16	TTC6		no	-0.0127118
chr1:100906852-100921841	83	yes	ENSG00000162695.11	SLC30A7		no	0.00485694
chr16:87975048-87984259	83	yes	ENSG00000172530.19	BANP		yes	0.375552
chr15:32964107-32969477	83	yes	ENSG00000248905.8	FMN1		no	0.399801
chr9:100498765-100516771	83	yes	ENSG00000251349.3	MSANTD3-TMEFF1		no
chr7:92294889-92307656	82	yes	ENSG00000001629.9	ANKIB1		yes	0.379183
chr15:72007826-72027793	82	yes	ENSG00000066933.15	MYO9A		yes	0.0180625
chr16:47497399-47547548	82	yes	ENSG00000102893.15	PHKB		no	0.470131
chr5:160035140-160051183	82	yes	ENSG00000113312.10	TTC1		no	0.717683
chr17:32171043-32176213	82	yes	ENSG00000126858.16	RHOT1		yes	0.373907	ENST00000580976.1
chr12:68650400-68654252	82	yes	ENSG00000127314.17	RAP1B		yes	0.468493
chr10:15821656-15843272	82	yes	ENSG00000148481.13	FAM188A		no	0.38768
chr18:44701175-44701832	82	yes	ENSG00000152217.16	SETBP1		yes	0.146794
chr3:125277726-125331238	82	yes	ENSG00000163848.18	ZNF148		yes	-0.00369596
chr21:37108392-37148647	82	yes	ENSG00000182670.13	TTC3		yes	0.224455
chr1:25340474-25351693	82	yes	ENSG00000183726.10	TMEM50A		yes	0.263867
chr9:20819796-20823115	82	yes	ENSG00000188352.12	FOCAD		yes	0.294436
chr1:247138716-247159813	82	yes	ENSG00000196418.12	ZNF124		no	0.369928
chr19:23338727-23362725	82	no				no
chrX:94525211-94529483	82	no				no
chr2:206127797-206130242	81	yes	ENSG00000023228.13	NDUFS1		no	0.454591
chr10:68753852-68773099	81	yes	ENSG00000060339.13	CCAR1		no	0.1754
chr18:42015476-42029441	81	yes	ENSG00000078142.11	PIK3C3		no	0.0273726
chr6:53071057-53076543	81	yes	ENSG00000112146.16	FBXO9		yes	0.220666
chr1:20744744-20780540	81	yes	ENSG00000127483.17	HP1BP3		yes	0.286211
chr9:135866456-135883078	81	yes	ENSG00000130559.18	CAMSAP1		no	0.355694
chr1:61899583-61901459	81	yes	ENSG00000132849.18	INADL		no	0.039362
chr4:75790150-75790797	81	yes	ENSG00000138768.14	USO1		no	0.323518
chr4:102304317-102315830	81	yes	ENSG00000138821.12	SLC39A8		no	0.87438
chrX:118542725-118546116	81	yes	ENSG00000147251.15	DOCK11		no	0.286221
chr10:16752539-16782084	81	yes	ENSG00000148484.17	RSU1		yes	0.593491
chr13:20731841-20732121	81	yes	ENSG00000150456.10	N6AMT2		no	0.794448
chr1:198232553-198264235	81	yes	ENSG00000151414.14	NEK7		yes	0.123389
chr5:73078180-73082825	81	yes	ENSG00000157107.13	FCHO2		no	0.163104
chr8:60794986-60801593	81	yes	ENSG00000171316.11	CHD7		no	0.186928	ENST00000524602.5
chr4:7868622-7872080	81	no	ENSG00000196526.10	AFAP1		yes
chr10:113876521-113884380	81	yes	ENSG00000196865.4	NHLRC2		no	-0.166721
chr22:46626751-46637960	80	yes	ENSG00000075240.16	GRAMD4		yes	0.117232
chr15:63706780-63716473	80	yes	ENSG00000103657.13	HERC1		no	0.0398917
chr3:183643480-183672484	80	yes	ENSG00000114796.15	KLHL24		yes	0.271268
chr2:99449336-99464985	80	yes	ENSG00000135945.9	REV1		yes	-0.0596402
chr12:104927973-104928694	80	yes	ENSG00000136052.9	SLC41A2		yes	0.27246
chr15:98707562-98708107	80	yes	ENSG00000140443.13	IGF1R	yes	no	0.684702
chr3:16286342-16303592	80	yes	ENSG00000154814.13	OXNAD1		no	0.18241
chr9:125337018-125337591	80	yes	ENSG00000165219.21	GAPVD1		no	0.294012
chr9:35295696-35313989	80	yes	ENSG00000198722.12	UNC13B		no	0.773047
chr2:201145378-201149835	79	yes	ENSG00000003402.19	CFLAR		no	0.0225673
chr12:1180540-1190052	79	yes	ENSG00000082805.19	ERC1		no	0.000939408
chr11:89432784-89451895	79	yes	ENSG00000086991.12	NOX4		yes	0.479173	ENST00000375979.7
chr8:115587001-115587604	79	yes	ENSG00000104447.11	TRPS1		no	0.120272
chr17:62029541-62035608	79	yes	ENSG00000108510.9	MED13		no	0.642233
chr1:179043715-179054638	79	yes	ENSG00000116199.11	FAM20B		yes	-0.0442509
chr7:131429033-131445903	79	yes	ENSG00000128585.17	MKLN1		no	-0.113824
chr5:69174877-69175537	79	yes	ENSG00000134057.14	CCNB1		no	0.371703
chr5:50759643-50763242	79	yes	ENSG00000151883.16	PARP8		no	0.431376	ENST00000515175.5
chr1:47368469-47375293	79	yes	ENSG00000162368.13	CMPK1		no	0.305447
chr4:150761783-150808398	79	yes	ENSG00000198589.10	LRBA		no	0.0384129
chr15:32857015-32902040	79	yes	ENSG00000248905.8	FMN1		no	0.277131
chr8:54522888-54523264	79	no				no
chr3:123223559-123259589	78	no	ENSG00000065485.17	PDIA5		no
chr1:94458607-94483239	78	yes	ENSG00000117528.11	ABCD3		no	0.556009
chr12:98677425-98686873	78	yes	ENSG00000120868.13	APAF1		no	0.0779958	ENST00000333991.5
chr1:230663141-230675124	78	yes	ENSG00000135775.13	COG2		no	0.26051
chr1:63478764-63508570	78	yes	ENSG00000142856.16	ITGB3BP		no	0.14953
chr5:14741827-14758598	78	yes	ENSG00000154122.12	ANKH		no	0.596097
chr11:76463821-76472840	78	yes	ENSG00000158636.16	C11orf30		no	0.126107	ENST00000533972.5
chr16:11846501-11847806	78	yes	ENSG00000171490.12	RSL1D1		no	0.430021	ENST00000573618.5
chr9:20715322-20740340	78	yes	ENSG00000188352.12	FOCAD		yes	0.254836
chr14:102040236-102040673	78	yes	ENSG00000197102.10	DYNC1H1		no	-0.135538
chr6:2263601-2273417	78	yes	ENSG00000250903.8	GMDS-AS1		no	0.099944	ENST00000530346.5
chr1:149655699-149669310	78	yes	ENSG00000277147.4	LINC00869		no	0.521245
chr12:100204940-100207786	77	yes	ENSG00000075089.9	ACTR6		yes	0.40638
chr8:98547969-98596169	77	yes	ENSG00000104375.15	STK3		no	0.219636
chr4:2699680-2700544	77	yes	ENSG00000125386.14	FAM193A		no	-0.124806
chr20:23389946-23403072	77	yes	ENSG00000125814.17	NAPB		yes	-0.189556
chr7:66993217-66994341	77	yes	ENSG00000126524.9	SBDS		no	0.565715
chr11:17878208-18010139	77	yes	ENSG00000129158.10	SERGEF		yes	0.162067
chr8:99575658-99585517	77	no	ENSG00000132549.18	VPS13B		no
chr1:151658235-151668635	77	yes	ENSG00000143376.12	SNX27		no	0.118684
chr5:108348399-108367953	77	yes	ENSG00000145743.15	FBXL17		yes	-0.0511802
chr16:18839698-18842454	77	yes	ENSG00000157106.16	SMG1		no	-0.16722
chr1:42773563-42775479	77	yes	ENSG00000164008.13	C1orf50		no	0.295395
chr20:53253499-53256571	77	yes	ENSG00000182463.15	TSHZ2		no	0.343626
chr8:53979025-54010492	77	yes	ENSG00000187735.12	TCEA1		no	0.239628
chr3:71684572-71710484	77	no				yes
chr2:32098796-32116212	76	yes	ENSG00000021574.11	SPAST		no	0.0424267
chr9:33271152-33278225	76	yes	ENSG00000086065.13	CHMP5		no	0.0178981
chr7:130039464-130049144	76	yes	ENSG00000091732.15	ZC3HC1		no	0.0731968
chr10:84417771-84425893	76	yes	ENSG00000107771.15	CCSER2		yes	-0.00539503
chr2:23798138-23823569	76	yes	ENSG00000119778.14	ATAD2B		no	-0.0360864
chr14:99257471-99257839	76	yes	ENSG00000127152.17	BCL11B		no	0.176005
chr1:48355670-48359770	76	yes	ENSG00000132122.11	SPATA6		no	0.024497
chr1:180984677-181005463	76	yes	ENSG00000135823.13	STX6		yes	0.103966
chr2:213310059-213340270	76	yes	ENSG00000144451.18	SPAG16		no	0.758161
chr5:143037196-143057747	76	yes	ENSG00000145819.15	ARHGAP26		no	0.102197
chr10:126970702-127008804	76	yes	ENSG00000150760.12	DOCK1		no	0.485837
chr8:37870420-37877551	76	yes	ENSG00000156675.15	RAB11FIP1		yes	0.579316
chr1:9931891-9934860	76	yes	ENSG00000162441.11	LZIC		no	0.345686
chr1:61088149-61112343	76	no	ENSG00000162599.15	NFIA		no
chr3:56627037-56628614	76	yes	ENSG00000163946.13	FAM208A		no	0.511395
chr21:44855210-44861271	76	yes	ENSG00000183255.11	PTTG1IP		no	0.341106	ENST00000445724.3
chr17:5308694-5332152	75	yes	ENSG00000029725.16	RABEP1		no	0.21064
chr2:135675332-135680324	75	yes	ENSG00000048991.16	R3HDM1		no	-0.127619
chr14:63998914-64016631	75	yes	ENSG00000054654.15	SYNE2		no	0.102707
chr8:119788338-119797846	75	yes	ENSG00000064313.11	TAF2		no	0.22244
chr1:77711747-77715868	75	yes	ENSG00000077254.14	USP33		no	0.428202
chr12:71769800-71774022	75	yes	ENSG00000080371.5	RAB21		no	0.0223331
chr3:149846011-149902162	75	yes	ENSG00000082996.19	RNF13		yes	0.565853
chr4:186706563-186709845	75	yes	ENSG00000083857.13	FAT1		yes	0.799095
chr14:76166663-76195972	75	yes	ENSG00000089916.17	GPATCH2L		yes	-0.252371
chr11:118583809-118584644	75	yes	ENSG00000095139.13	ARCN1		no	0.312039	ENST00000534182.2
chr10:91994535-92008275	75	yes	ENSG00000095564.13	BTAF1		no	0.0225211
chr2:214745067-214797117	75	yes	ENSG00000138376.10	BARD1		no	0.712368	ENST00000613192.1
chr8:97686668-97691188	75	yes	ENSG00000147649.9	MTDH		no	0.312281
chr18:44701175-44759103	75	no	ENSG00000152217.16	SETBP1		yes
chr18:44701175-44869283	75	yes	ENSG00000152217.16	SETBP1		yes	0.193034
chr13:28256292-28261458	75	yes	ENSG00000152520.13	PAN3		no	-0.0468937
chr6:73723251-73736508	75	yes	ENSG00000156535.13	CD109		no	0.468514
chr7:98190728-98194572	75	yes	ENSG00000164715.5	LMTK2		no	0.271205
chr13:21167988-21168399	75	yes	ENSG00000165480.15	SKA3		no	0.576919	ENST00000462482.1
chr5:112985835-113004077	75	yes	ENSG00000172795.15	DCP2		no	0.109712
chr3:47675475-47678311	75	yes	ENSG00000173473.10	SMARCC1		no	0.322795
chr2:85043564-85049648	75	yes	ENSG00000176407.17	KCMF1		no	0.220043
chr21:37087247-37108446	75	yes	ENSG00000182670.13	TTC3		yes	0.129503
chr21:39215237-39218660	75	yes	ENSG00000185658.13	BRWD1		no	-0.106657
chr1:28742403-28743986	75	yes	ENSG00000198492.14	YTHDF2		yes	0.695136
chr10:45975454-45988847	75	yes	ENSG00000265354.3	TIMM23		no	0.645237
chr11:65499364-65499870	75	no				no
chr3:96617805-96618005	75	no				no
chr9:105524415-105525942	75	no				no
chr3:172251260-172298787	74	yes	ENSG00000075420.12	FNDC3B		no	0.212731
chr10:84371014-84373815	74	yes	ENSG00000107771.15	CCSER2		yes	0.222272
chr20:18297985-18306393	74	yes	ENSG00000125846.15	ZNF133		yes	0.234813	ENST00000630056.1
chr11:83273647-83278829	74	yes	ENSG00000137500.9	CCDC90B		yes	0.517037
chr1:151315573-151316509	74	yes	ENSG00000143393.16	PI4KB		yes	0.400671	ENST00000430800.5
chr2:8943187-8958642	74	yes	ENSG00000143797.11	MBOAT2		no	0.228522	ENST00000477073.5
chr16:4466153-4469465	74	yes	ENSG00000153406.13	NMRAL1		no	0.306193
chr7:140776912-140808995	74	yes	ENSG00000157764.12	BRAF	yes	no	-0.125417
chr4:74174506-74225394	74	yes	ENSG00000163738.18	MTHFD2L		yes	0.278169
chr5:50402286-50411383	74	yes	ENSG00000170571.11	EMB		no	0.261144
chr6:47503280-47554766	74	yes	ENSG00000198087.7	CD2AP		no	0.333249
chr2:202555252-202556531	74	yes	ENSG00000204217.12	BMPR2		no	0.280687
chr11:66639700-66640123	74	yes	ENSG00000248643.5	RBM14-RBM4		yes	0.21391	ENST00000500635.2
chr17:37283267-37289528	74	yes	ENSG00000278540.4	ACACA		yes	0.0837044
chr11:65499651-65499869	74	no				no
chr4:182891403-182915575	74	no				yes
chr14:65561337-65629606	73	yes	ENSG00000033170.16	FUT8		yes	0.146682
chr7:39987599-39988258	73	yes	ENSG00000065883.14	CDK13		yes	0.336601
chr8:42401788-42403461	73	yes	ENSG00000078668.13	VDAC3		no	0.624964
chr20:34470048-34492597	73	yes	ENSG00000078747.12	ITCH		no	0.22485
chr14:80743075-80761613	73	yes	ENSG00000100629.16	CEP128		no	0.0768587
chr9:135850137-135883078	73	yes	ENSG00000130559.18	CAMSAP1		yes	0.307991
chr9:33996223-34017189	73	yes	ENSG00000137073.20	UBAP2		yes	0.141277
chr2:43794457-43805246	73	yes	ENSG00000138036.18	DYNC2LI1		no	0.0518939
chr12:128814775-128815070	73	yes	ENSG00000139370.10	SLC15A4		no	0.0339623
chr1:154251041-154251653	73	yes	ENSG00000143569.18	UBAP2L		no	0.0237892
chr12:104991712-104996026	73	yes	ENSG00000151131.9	C12orf45		no	0.0699097
chr3:171188702-171194635	73	yes	ENSG00000154310.16	TNIK		no	0.226449
chr15:89871475-89889140	73	yes	ENSG00000157823.16	AP3S2		no	-0.0569522
chr4:94573351-94618191	73	yes	ENSG00000163110.14	PDLIM5		yes	0.145173
chr3:43299754-43303792	73	yes	ENSG00000163788.13	SNRK		yes	0.230552	ENST00000437827.1
chr10:43154897-43158931	73	yes	ENSG00000169826.7	CSGALNACT2		yes	0.392562
chr19:52076044-52089002	73	yes	ENSG00000197608.11	ZNF841		yes	-0.00607187
chr6:26204704-26204927	73	no				no
chr9:83659780-83686155	73	no				no
chr11:77693507-77702495	72	yes	ENSG00000048649.13	RSF1		yes	0.717208
chr1:12275825-12278038	72	yes	ENSG00000048707.13	VPS13D		no	-0.0349148
chr18:42027443-42049605	72	yes	ENSG00000078142.11	PIK3C3		yes	0.100553
chr1:108148279-108161293	72	yes	ENSG00000085491.15	SLC25A24		no	0.205929
chr14:31127785-31133675	72	yes	ENSG00000092148.12	HECTD1		no	0.170442
chr18:22990937-23001729	72	yes	ENSG00000101773.16	RBBP8		no	0.587332
chr19:38141184-38142710	72	yes	ENSG00000105738.10	SIPA1L3		no	0.145667
chr12:101723168-101730636	72	yes	ENSG00000111666.10	CHPT1		no	0.438117
chr3:3156219-3174261	72	yes	ENSG00000113851.13	CRBN		no	0.400569
chr2:190900564-190924593	72	yes	ENSG00000115419.12	GLS		no	0.5465
chr2:106145190-106166083	72	yes	ENSG00000115652.14	UXS1		no	0.578486	ENST00000441952.5
chr6:136388393-136389517	72	yes	ENSG00000135525.18	MAP7		yes	0.517861	ENST00000616617.4
chr3:142736379-142748460	72	yes	ENSG00000144935.14	TRPC1		no	0.190472
chr10:110881233-110890670	72	yes	ENSG00000150593.15	PDCD4		no	0.447824
chr14:33215182-33215587	72	yes	ENSG00000151322.18	NPAS3		yes	0.751186
chr13:28174272-28177935	72	yes	ENSG00000152520.13	PAN3		yes	-0.0751668
chr16:18834892-18845651	72	yes	ENSG00000157106.16	SMG1		no	-0.192125
chr6:7602623-7606195	72	yes	ENSG00000168566.11	SNRNP48		no	0.136383
chr2:30552493-30568176	72	yes	ENSG00000172954.13	LCLAT1		no	0.0995528
chr17:31940286-31973231	72	yes	ENSG00000178691.10	SUZ12		no	0.479729
chr1:66946150-66959743	72	yes	ENSG00000198160.14	MIER1		yes	0.482295
chr19:20544619-20545976	72	yes	ENSG00000237440.8	ZNF737		no	0.455892
chr10:5794885-5800705	71	yes	ENSG00000057608.16	GDI2		no	0.356184
chr7:90726567-90747775	71	yes	ENSG00000058091.16	CDK14		yes	0.419156	ENST00000484035.5
chr19:1271329-1272051	71	yes	ENSG00000099622.13	CIRBP		no	0.21654
chr18:54271360-54274090	71	yes	ENSG00000101751.10	POLI		yes	0.186996
chr12:101714090-101716812	71	yes	ENSG00000111666.10	CHPT1		no	0.278636
chr1:94458607-94480606	71	yes	ENSG00000117528.11	ABCD3		no	0.499234
chr14:74029184-74046130	71	yes	ENSG00000119636.15	CCDC176		yes	0.598193
chr7:33146242-33177591	71	yes	ENSG00000122507.20	BBS9		yes	0.302719
chr5:139600372-139614966	71	yes	ENSG00000131508.15	UBE2D2		yes	0.616856
chr5:55963352-55968396	71	yes	ENSG00000134352.19	IL6ST		no	0.0533832	ENST00000381286.7
chr9:33944365-33956146	71	yes	ENSG00000137073.20	UBAP2		no	0.175997	ENST00000539807.5
chr8:97661072-97691188	71	yes	ENSG00000147649.9	MTDH		no	0.174282
chr6:116645714-116660846	71	yes	ENSG00000153975.9	ZUFSP		no	0.260617
chr4:86772778-86775652	71	yes	ENSG00000163629.12	PTPN13		no	0.368678
chr15:83151215-83164075	71	yes	ENSG00000166503.8	HDGFRP3		no	0.352059
chr2:231075511-231087181	71	yes	ENSG00000173692.12	PSMD1		no	0.366704
chrX:1285778-1290509	71	yes	ENSG00000198223.14	CSF2RA		yes	0.478574
chr4:16238771-16323036	71	no	ENSG00000263327.6	TAPT1-AS1		no
chr9:83975758-83976994	71	no				no
chr2:200856682-200856985	70	yes	ENSG00000013441.15	CLK1		no	0.104205
chr1:172555869-172557794	70	yes	ENSG00000094975.13	SUCO		no	0.0243215
chr10:50069547-50080931	70	yes	ENSG00000099290.15	FAM21A		yes	0.0466714
chr15:42260958-42268032	70	yes	ENSG00000103978.15	TMEM87A		yes	0.0239879
chr17:30484214-30492753	70	yes	ENSG00000108587.14	GOSR1		yes	0.208337
chr2:58198594-58232112	70	yes	ENSG00000115392.11	FANCL		no	0.0271578	ENST00000446381.5
chr1:243613671-243695716	70	yes	ENSG00000117020.16	AKT3		no	0.608105
chr2:64551443-64553409	70	yes	ENSG00000119844.14	AFTPH		yes	0.262519
chr5:61472681-61494410	70	yes	ENSG00000130449.5	ZSWIM6		no	0.204578
chr6:73466209-73466606	70	yes	ENSG00000135297.15	MTO1		yes	0.32887
chr2:65090983-65104806	70	yes	ENSG00000138069.16	RAB1A		no	0.407856
chr4:120754553-120811449	70	yes	ENSG00000138738.10	PRDM5		no	0.247593
chr15:90441506-90443478	70	yes	ENSG00000140575.12	IQGAP1		no	0.335652	ENST00000560738.1
chr2:99837477-100011571	70	yes	ENSG00000144218.18	AFF3		no	0.211743
chr8:38347497-38348215	70	yes	ENSG00000147548.16	WHSC1L1		yes	0.685668
chr5:123545417-123575963	70	yes	ENSG00000151292.17	CSNK1G3		yes	0.252222
chr3:57242856-57267792	70	yes	ENSG00000157500.10	APPL1		no	0.0259783
chr10:43154897-43176032	70	yes	ENSG00000169826.7	CSGALNACT2		yes	0.642204
chr18:58696366-58700591	70	yes	ENSG00000172175.12	MALT1		no	0.182391
chr2:86975728-86976290	70	yes	ENSG00000187627.14	RGPD1		no	-0.154178
chr8:61618978-61646878	70	yes	ENSG00000198363.15	ASPH		yes	0.138529	ENST00000522349.5
chr2:131553013-131613103	70	no				no
chr6:107921797-107929514	69	yes	ENSG00000025796.13	SEC63		no	-0.00824644
chr5:65451475-65473952	69	yes	ENSG00000049192.14	ADAMTS6		yes	0.33151
chr5:153997803-154034967	69	yes	ENSG00000055147.17	FAM114A2		yes	0.259878
chr6:149378018-149379518	69	yes	ENSG00000055208.17	TAB2		no	0.475226
chr14:101901719-101906529	69	yes	ENSG00000078304.19	PPP2R5C		no	0.571499
chr6:130926605-130956499	69	yes	ENSG00000079819.16	EPB41L2		yes	0.0971938
chr8:67118248-67137603	69	yes	ENSG00000104218.13	CSPP1		no	-0.0681218
chr2:39056702-39058804	69	yes	ENSG00000115904.12	SOS1		no	-0.0145621
chr2:47373463-47374048	69	yes	ENSG00000119888.10	EPCAM		no	0.187854
chr7:92517276-92519078	69	yes	ENSG00000127980.15	PEX1		no	0.021744	ENST00000438045.5
chr1:155721517-155726019	69	yes	ENSG00000132676.15	DAP3		no	0.24977
chr9:83682951-83686155	69	yes	ENSG00000135018.13	UBQLN1		no	0.263747	ENST00000529923.1
chr4:76124649-76144473	69	yes	ENSG00000138750.14	NUP54		no	0.379001
chr1:8614561-8656441	69	yes	ENSG00000142599.17	RERE		yes	-0.137908
chr1:235341708-235342883	69	no	ENSG00000152904.11	GGPS1		yes
chr3:71690010-71710484	69	yes	ENSG00000163412.12	EIF4E3		yes	0.138298
chr10:4830675-4908420	69	no	ENSG00000165568.17	AKR1E2		no
chr3:123931102-123949132	69	yes	ENSG00000175455.14	CCDC14		yes	-0.0224083	ENST00000483247.1
chr11:83111113-83117197	69	no				no
chr21:36130636-36130929	69	no				no
chr7:87964634-87978412	68	yes	ENSG00000008277.14	ADAM22		no	0.344908
chr3:100295087-100298045	68	yes	ENSG00000036054.12	TBC1D23		no	0.218148
chr13:49168613-49178654	68	yes	ENSG00000102531.16	FNDC3A		no	0.281418
chr15:29761139-29773357	68	yes	ENSG00000104067.16	TJP1		no	0.0641623
chr7:157382246-157385611	68	yes	ENSG00000105993.14	DNAJB6		no	0.462276	ENST00000443280.5
chr2:58221942-58232112	68	yes	ENSG00000115392.11	FANCL		no	0.292296	ENST00000403676.5
chr1:243563720-243843282	68	yes	ENSG00000117020.16	AKT3		yes	0.470618
chr7:158788004-158798076	68	yes	ENSG00000117868.15	ESYT2		no	0.592529
chr10:100937402-100944128	68	yes	ENSG00000119906.11	FAM178A		no	-0.0605006
chr14:64521487-64523402	68	yes	ENSG00000126804.13	ZBTB1		yes	0.369101
chrX:37386599-37426000	68	yes	ENSG00000130962.17	PRRG1		yes	0.25079
chr7:22308339-22318037	68	yes	ENSG00000136237.18	RAPGEF5		yes	0.0396382
chr10:21882282-21920963	68	yes	ENSG00000136770.10	DNAJC1		no	0.747427
chr15:51893815-51902036	68	yes	ENSG00000138594.12	TMOD3		no	0.0128871
chr6:158573420-158589782	68	yes	ENSG00000146433.8	TMEM181		no	0.204168
chr4:128936655-128959777	68	yes	ENSG00000151466.11	SCLT1		no	0.231098	ENST00000439369.6
chr19:5653115-5654456	68	yes	ENSG00000160633.12	SAFB		no	0.0416092
chr3:47610066-47678311	68	yes	ENSG00000173473.10	SMARCC1		no	-0.00695819
chr6:167022409-167033971	68	yes	ENSG00000213066.11	FGFR1OP		no	-0.0910239
chr17:64501513-64501718	68	no				no
chrX:136668063-136781148	68	no				yes
chr2:32114638-32116212	67	yes	ENSG00000021574.11	SPAST		no	-0.0214683
chr18:58165788-58252054	67	yes	ENSG00000049759.16	NEDD4L		no	0.292609	ENST00000589054.5
chr7:90726567-90726812	67	yes	ENSG00000058091.16	CDK14		yes	0.210802	ENST00000484035.5
chr5:128131067-128141981	67	yes	ENSG00000064651.13	SLC12A2		no	0.526017
chr12:350621-354234	67	yes	ENSG00000073614.11	KDM5A		no	0.260009	ENST00000544760.1
chr11:86012281-86031611	67	yes	ENSG00000073921.17	PICALM		yes	0.313559
chr10:27022558-27048979	67	yes	ENSG00000107890.16	ANKRD26		no	0.416701
chr4:102525512-102537956	67	yes	ENSG00000109320.11	NFKB1		yes	0.418947
chr4:1900626-1939778	67	yes	ENSG00000109685.17	WHSC1		yes	0.242481
chr6:75702645-75703072	67	yes	ENSG00000112701.17	SENP6		no	-0.114044
chr4:82878730-82881940	67	yes	ENSG00000138674.16	SEC31A		yes	0.00956443
chr8:38819522-38820635	67	yes	ENSG00000147526.19	TACC1		yes	0.828549	ENST00000276520.12
chr2:134253095-134254644	67	yes	ENSG00000152127.8	MGAT5		yes	0.100146	ENST00000481801.5
chr8:123333878-123336532	67	yes	ENSG00000156802.12	ATAD2		no	0.465846
chr3:57847197-57858159	67	yes	ENSG00000163681.14	SLMAP		no	0.0293081
chr9:83768818-83788678	67	yes	ENSG00000165113.12	GKAP1		no	0.609695
chr14:49799475-49831361	67	yes	ENSG00000165525.17	NEMF		no	0.435772
chr8:42957094-42964474	67	yes	ENSG00000168172.8	HOOK3		no	-0.184127
chr19:3660966-3662001	67	yes	ENSG00000186111.8	PIP5K1C		no	0.102146
chr12:111933886-111943369	67	yes	ENSG00000198270.12	TMEM116		yes	0.0357665
chr1:28473554-28476291	67	yes	ENSG00000204138.12	PHACTR4		no	-0.0623085
chr4:40594258-40596800	67	no				no
chr7:92294889-92319512	66	yes	ENSG00000001629.9	ANKIB1		yes	0.193905
chr7:92294889-92352642	66	yes	ENSG00000001629.9	ANKIB1		yes	0.478567
chr3:169976946-169985865	66	yes	ENSG00000008952.16	SEC62		no	0.390303
chr3:27448651-27452498	66	yes	ENSG00000033867.16	SLC4A7		no	0.20779
chr14:80743075-80778046	66	yes	ENSG00000100629.16	CEP128		no	0.138214
chr20:47276314-47287284	66	yes	ENSG00000101040.19	ZMYND8		no	0.0245591
chr16:84740309-84745673	66	yes	ENSG00000103194.15	USP10		no	0.588204	ENST00000563048.5
chr8:98706467-98707311	66	yes	ENSG00000104375.15	STK3		no	0.329423	ENST00000521649.5
chr8:108449823-108450492	66	yes	ENSG00000104412.7	EMC2		no	-0.0712429
chr7:11061791-11111467	66	yes	ENSG00000106443.14	PHF14		no	0.0290435
chr1:155378281-155415923	66	yes	ENSG00000116539.10	ASH1L		no	0.0172406
chr1:94487542-94491247	66	yes	ENSG00000117528.11	ABCD3		no	0.181644
chr9:112262435-112297916	66	yes	ENSG00000119314.15	PTBP3		yes	0.031951
chr4:168890922-168916027	66	yes	ENSG00000129116.17	PALLD		no	0.37693
chr19:5604583-5604936	66	yes	ENSG00000130254.11	SAFB2		no	-0.247317
chr2:239990074-240014860	66	yes	ENSG00000130414.11	NDUFA10		no	0.242305
chr18:76849526-76871825	66	yes	ENSG00000130856.15	ZNF236		no	-0.230477
chr13:39694634-39727548	66	yes	ENSG00000133103.16	COG6		no	0.480563
chr1:52509596-52526373	66	yes	ENSG00000134744.13	ZCCHC11		yes	-0.112312
chr1:8495063-8541318	66	yes	ENSG00000142599.17	RERE		yes	-0.0210583
chr4:106171095-106212835	66	yes	ENSG00000145348.16	TBCK		no	-0.28001
chr18:24143091-24143413	66	yes	ENSG00000154040.20	CABYR		yes	0.435326	ENST00000585037.5
chr15:42950262-42966286	66	yes	ENSG00000159459.11	UBR1		no	-0.040705
chr14:49795791-49831361	66	yes	ENSG00000165525.17	NEMF		no	0.314679
chr11:87067694-87091395	66	yes	ENSG00000166575.16	TMEM135		no	-0.0888431	ENST00000532959.5
chr19:11722954-11723342	66	no				no
chr21:8213912-8441301	66	no				no
chr3:151539153-151600951	66	no				no
chr7:140334634-140337349	66	no				no
chr3:172251260-172307501	65	yes	ENSG00000075420.12	FNDC3B		no	0.158574
chr3:183070999-183071357	65	yes	ENSG00000078070.11	MCCC1		no	0.221066
chr9:2191266-2192802	65	no	ENSG00000080503.19	SMARCA2		no
chr7:122615181-122629328	65	yes	ENSG00000081803.15	CADPS2		no	0.720805
chr9:27009020-27048274	65	yes	ENSG00000096872.15	IFT74		no	0.474332
chr6:159682474-159688242	65	yes	ENSG00000112096.16	SOD2		no	0.410041
chr9:112403995-112418958	65	yes	ENSG00000119471.14	HSDL2		no	0.404943
chr7:77571078-77600806	65	yes	ENSG00000127947.15	PTPN12		yes	0.00305663
chr11:83273647-83280260	65	yes	ENSG00000137500.9	CCDC90B		yes	0.189007
chr1:8495063-8557523	65	yes	ENSG00000142599.17	RERE		yes	0.0319152
chr6:20781145-20846178	65	yes	ENSG00000145996.11	CDKAL1		no	0.266736
chr10:126970702-127110354	65	yes	ENSG00000150760.12	DOCK1		no	0.677139
chr8:30474779-30504436	65	yes	ENSG00000157110.15	RBPMS		yes	0.327232
chr9:114636990-114638726	65	yes	ENSG00000157693.14	C9orf91		no	0.403861
chr4:86764593-86767976	65	yes	ENSG00000163629.12	PTPN13		no	0.242949
chr3:32733423-32737490	65	yes	ENSG00000182973.18	CNOT10		no	0.636721
chr21:39206108-39229436	65	yes	ENSG00000185658.13	BRWD1		no	0.157816
chr1:201852104-201858994	65	yes	ENSG00000198700.9	IPO9		no	0.201733
chr14:102968253-102970261	65	yes	ENSG00000198752.9	CDC42BPB		no	0.195582
chr10:5699501-5714208	65	no				no
chr21:14991201-15043574	65	no				no
chr1:243293091-243308177	64	yes	ENSG00000054282.15	SDCCAG8		no	0.227225
chr11:89354962-89402542	64	yes	ENSG00000086991.12	NOX4		no	0.428403	ENST00000525196.5
chr6:151880655-151944508	64	yes	ENSG00000091831.21	ESR1	yes	no	-0.10545	ENST00000406599.5
chr22:28296198-28297852	64	yes	ENSG00000100154.14	TTC28		no	0.0948211
chr17:29285992-29287716	64	yes	ENSG00000108256.8	NUFIP2		no	0.890126	ENST00000579665.1
chr4:102714438-102726683	64	yes	ENSG00000109323.8	MANBA		no	-0.0454373
chr6:36524341-36540207	64	yes	ENSG00000112079.8	STK38		yes	0.153338
chr6:75634707-75670720	64	yes	ENSG00000112701.17	SENP6		no	0.127475
chr1:81836885-81907230	64	yes	ENSG00000117114.19	ADGRL2		yes	0.630267
chr20:63775678-63790790	64	yes	ENSG00000130584.10	ZBTB46		yes	0.398351
chr5:140438461-140449305	64	yes	ENSG00000131503.20	ANKHD1		no	-0.188847
chr1:52477708-52481923	64	yes	ENSG00000134744.13	ZCCHC11		no	-0.205096
chr14:37748939-37796947	64	yes	ENSG00000139865.16	TTC6		yes	0.187172	ENST00000533625.5
chr1:179131311-179133374	64	yes	ENSG00000143322.19	ABL2		no	0.0418644
chr10:103438015-103438808	64	yes	ENSG00000148843.13	PDCD11		no	0.14313
chr2:172558708-172566933	64	yes	ENSG00000152256.13	PDK1		no	0.367105
chr3:155893518-155911279	64	yes	ENSG00000163655.15	GMPS		no	0.449234
chr10:102157019-102158214	64	yes	ENSG00000166197.16	NOLC1		no	0.02209	ENST00000603946.5
chr15:65178934-65180204	64	yes	ENSG00000166855.9	CLPX		no	0.206119
chr10:32019858-32021287	64	yes	ENSG00000170759.10	KIF5B		no	0.21774
chr9:111527268-111534353	64	yes	ENSG00000173258.12	ZNF483		yes	0.771733
chr15:93000512-93014909	64	yes	ENSG00000173575.18	CHD2		no	-0.0195652
chr1:172140480-172144437	64	no				no
chr1:226379183-226380086	64	no				no
chr11:65499046-65499269	64	no				no
chr2:8939821-8958642	64	no				no
chr21:36130550-36130925	64	no				no
chr6:20546346-20548705	64	no				yes
chr14:58318542-58330169	63	yes	ENSG00000032219.18	ARID4A		no	0.514586
chr15:68141946-68164804	63	yes	ENSG00000033800.13	PIAS1		no	0.0879755
chr7:90726567-90790652	63	yes	ENSG00000058091.16	CDK14		yes	0.310907
chr1:113585387-113594560	63	yes	ENSG00000081026.18	MAGI3		no	0.221251
chr2:164692221-164695836	63	yes	ENSG00000082438.15	COBLL1		no	0.0254989
chr13:24475472-24478276	63	yes	ENSG00000102699.5	PARP4		no	0.181191
chr13:30227412-30241086	63	yes	ENSG00000102781.13	KATNAL1		no	0.0827084
chr7:151484737-151498180	63	yes	ENSG00000106615.9	RHEB		no	0.190545
chr6:43055545-43056445	63	yes	ENSG00000112651.11	MRPL2		no	0.326385	ENST00000489623.1
chr4:39837856-39842056	63	yes	ENSG00000121892.14	PDS5A		no	0.195603
chr12:28255581-28307749	63	yes	ENSG00000123106.10	CCDC91		yes	0.112926	ENST00000536154.5
chr5:179709873-179720560	63	yes	ENSG00000127022.14	CANX		no	0.149174
chr13:48077153-48090418	63	yes	ENSG00000136146.14	MED4		yes	0.166202
chr2:214752447-214781509	63	yes	ENSG00000138376.10	BARD1		no	0.52466	ENST00000613192.1
chr18:23507985-23509279	63	yes	ENSG00000141452.9	C18orf8		no	0.312322	ENST00000590868.5
chr6:20781145-20955585	63	yes	ENSG00000145996.11	CDKAL1		no	0.179582
chr10:67988663-68014186	63	yes	ENSG00000148634.15	HERC4		no	0.0325823
chr3:33358967-33364719	63	yes	ENSG00000153558.13	FBXL2		no	0.1934	ENST00000432809.5
chr15:59030804-59031702	63	yes	ENSG00000157450.15	RNF111		yes	0.018497
chr15:72518067-72561549	63	yes	ENSG00000166233.12	ARIH1		no	0.0990093
chr5:74634684-74636498	63	yes	ENSG00000171617.13	ENC1		yes	0.186297
chr5:94909251-94924021	63	yes	ENSG00000175471.19	MCTP1		yes	0.444085
chr17:15716059-15717313	63	yes	ENSG00000187607.15	ZNF286A		no	0.669742	ENST00000583675.5
chr1:36361221-36362656	63	yes	ENSG00000196182.10	STK40		yes	-0.0329155
chr1:117911994-117918736	63	yes	ENSG00000196505.10	GDAP2		no	-0.15236
chrX:47846105-47895940	63	yes	ENSG00000197779.13	ZNF81		yes	0.345373
chr6:47533602-47554766	63	yes	ENSG00000198087.7	CD2AP		no	0.363949
chr8:47953620-47957431	63	yes	ENSG00000253729.7	PRKDC		no	0.260696
chr11:65499046-65499238	63	no				no
chr17:64519322-64526201	63	no				no
chr7:105038126-105041023	62	yes	ENSG00000005483.19	KMT2E		yes	-0.0815757
chr6:42663258-42666245	62	yes	ENSG00000024048.10	UBR2		no	-0.076253
chr3:27437388-27448797	62	yes	ENSG00000033867.16	SLC4A7		no	0.210137
chr18:196637-204692	62	yes	ENSG00000101557.14	USP14		no	0.354115
chr16:48347507-48348290	62	yes	ENSG00000102910.13	LONP2		no	0.101573
chr8:98706467-98722969	62	yes	ENSG00000104375.15	STK3		no	0.142912	ENST00000521649.5
chr11:46493608-46508370	62	yes	ENSG00000110497.14	AMBRA1		no	0.0572303
chr5:168568646-168568998	62	yes	ENSG00000120137.6	PANK3		no	0.119323
chr8:132610166-132625454	62	yes	ENSG00000129295.8	LRRC6		no	0.503833
chr10:110124017-110130486	62	yes	ENSG00000148700.13	ADD3		no	0.26026
chr10:4830675-4873307	62	no	ENSG00000165568.17	AKR1E2		no
chr1:15638307-15643650	62	yes	ENSG00000197312.11	DDI2		no	-0.237282
chr10:32543300-32623817	62	yes	ENSG00000216937.11	CCDC7		yes	-0.149286
chr11:65499630-65499918	62	no				no
chr7:6463136-6466243	62	no				no
chr2:224535528-224557856	61	yes	ENSG00000036257.12	CUL3		yes	0.341222
chr14:96341522-96347341	61	yes	ENSG00000066739.11	ATG2B		no	-0.14994
chr22:31758546-31768863	61	yes	ENSG00000100150.16	DEPDC5		no	-0.151032
chr18:9931810-9950568	61	yes	ENSG00000101558.13	VAPA		no	0.259664
chr5:31448547-31451640	61	yes	ENSG00000113360.16	DROSHA		no	0.214549
chr1:29154696-29154910	61	yes	ENSG00000116350.15	SRSF4		no	-0.0206759
chr6:85517756-85530275	61	yes	ENSG00000135317.12	SNX14		no	0.327583
chr5:143054439-143057747	61	yes	ENSG00000145819.15	ARHGAP26		no	-0.0103536
chr10:110885253-110890670	61	yes	ENSG00000150593.15	PDCD4		no	0.226449
chr15:56391243-56394834	61	yes	ENSG00000151575.14	TEX9		yes	0.352559
chr3:184886110-184900972	61	yes	ENSG00000156931.15	VPS8		no	0.0793355
chr3:185598412-185613408	61	yes	ENSG00000163904.12	SENP2		no	0.306083
chr6:130184103-130184623	61	yes	ENSG00000164483.16	SAMD3		no	0.458696
chr15:72518067-72555907	61	yes	ENSG00000166233.12	ARIH1		no	0.399135
chr11:117152441-117163892	61	yes	ENSG00000168092.13	PAFAH1B2		yes	0.19555	ENST00000526888.1
chr8:61618978-61684188	61	yes	ENSG00000198363.15	ASPH		yes	0.508539
chr5:73840480-73840760	61	yes	ENSG00000214944.9	ARHGEF28		no	-0.0977986
chr1:153614326-153614582	61	no				no
chr2:131553013-131639178	61	no				no
chr3:13129305-13129525	61	no				no
chr3:8559425-8560128	61	no				no
chr5:171183199-171205612	61	no				no
chr9:83975745-83976994	61	no				no
chr2:121605701-121606180	60	yes	ENSG00000074054.17	CLASP1		yes	0.283783
chr10:20868664-20899450	60	no	ENSG00000078114.18	NEBL		yes
chr7:6046071-6050045	60	yes	ENSG00000086232.12	EIF2AK1		no	0.0532735
chr16:87748673-87762040	60	yes	ENSG00000104731.13	KLHDC4		no	0.083093
chr10:101672915-101676436	60	yes	ENSG00000107829.13	FBXW4		no	0.273521
chr6:57193842-57210445	60	yes	ENSG00000112210.11	RAB23		yes	0.54707
chr5:65988635-66014725	60	yes	ENSG00000112851.14	ERBB2IP		yes	0.492609
chr14:20403377-20406400	60	yes	ENSG00000129566.12	TEP1		no	-0.0945084
chr8:38114192-38135766	60	yes	ENSG00000129691.15	ASH2L		no	0.610796
chr22:45689712-45702847	60	yes	ENSG00000130638.15	ATXN10		no	0.38922
chr1:179990507-179997175	60	yes	ENSG00000135837.15	CEP350		no	-0.00544997
chr1:173992755-173993135	60	yes	ENSG00000135870.11	RC3H1		yes	-0.0269155
chr1:176162869-176184692	60	yes	ENSG00000143207.19	RFWD2		no	0.201244
chr1:95143891-95151419	60	yes	ENSG00000152078.9	TMEM56		yes	0.0678627
chr5:69373830-69374711	60	yes	ENSG00000152942.18	RAD17		no	0.027929	ENST00000504177.5
chr4:41013583-41014398	60	yes	ENSG00000163697.16	APBB2		no	0.141891
chr7:107362033-107372760	60	yes	ENSG00000164597.13	COG5		no	0.299308
chr17:55031168-55081183	60	yes	ENSG00000166263.13	STXBP4		no	0.054926
chr15:44328685-44338317	60	yes	ENSG00000166734.18	CASC4		no	0.0952565
chr8:60741259-60781430	60	yes	ENSG00000171316.11	CHD7		yes	0.199404
chr9:16435555-16437524	60	yes	ENSG00000173068.17	BNC2		no	0.328163
chr16:13934192-13935743	60	yes	ENSG00000175595.14	ERCC4	yes	no	0.0959362
chr15:60355919-60364523	60	yes	ENSG00000182718.16	ANXA2		no	0.661339
chr14:34792775-34862322	60	yes	ENSG00000198604.10	BAZ1A		no	0.375894
chr9:35228015-35243364	60	yes	ENSG00000198722.12	UNC13B		no	0.462991
chr1:243304714-243316894	60	no				no
chr11:101039120-101126158	60	no				yes
chr11:65499635-65499923	60	no				no
chr5:180248973-180280608	59	yes	ENSG00000050748.17	MAPK9		yes	0.356176
chr7:151484737-151491014	59	yes	ENSG00000106615.9	RHEB		no	-0.0187192
chr2:159169250-159170805	59	yes	ENSG00000115183.13	TANC1		no	-0.0470698
chr2:70224554-70230854	59	yes	ENSG00000116001.15	TIA1		no	-0.0107049
chr9:4860125-4860901	59	yes	ENSG00000120158.11	RCL1		no	0.575737
chr13:19993063-20006586	59	yes	ENSG00000121741.16	ZMYM2		yes	0.312255
chr9:131436620-131439061	59	yes	ENSG00000130723.17	PRRC2B		no	0.322519
chr1:155725382-155726019	59	yes	ENSG00000132676.15	DAP3		no	0.244322
chr6:84185187-84204096	59	yes	ENSG00000135315.11	CEP162		no	0.0331793
chr9:33960826-33963791	59	yes	ENSG00000137073.20	UBAP2		no	-0.164192	ENST00000539807.5
chr4:78826037-78851056	59	yes	ENSG00000138756.17	BMP2K		no	0.626021
chr15:63553715-63574403	59	yes	ENSG00000140455.16	USP3		no	-0.169082
chr1:151638888-151639119	59	yes	ENSG00000143376.12	SNX27		no	0.351051
chrX:41660439-41671530	59	yes	ENSG00000147044.20	CASK		no	0.30558
chr10:126970702-127061776	59	yes	ENSG00000150760.12	DOCK1		no	0.479249
chr8:18867674-18872733	59	yes	ENSG00000156011.16	PSD3		yes	0.234899
chr21:43094471-43095743	59	yes	ENSG00000160201.11	U2AF1		yes	-0.156985
chrX:17133824-17138961	59	yes	ENSG00000169891.17	REPS2		no	0.10449
chr5:94888879-94912976	59	yes	ENSG00000175471.19	MCTP1		yes	0.405798
chr1:202001376-202003461	59	yes	ENSG00000176393.10	RNPEP		no	0.0943782
chr12:79592611-79621207	59	yes	ENSG00000177425.10	PAWR		no	0.0890222	ENST00000549050.1
chr22:40881770-40882177	59	yes	ENSG00000196236.12	XPNPEP3		no	0.265126
chr2:27599583-27601442	59	yes	ENSG00000243943.9	ZNF512		no	0.0170008
chr19:18175040-18175697	59	yes	ENSG00000268173.1	PIK3R2		no	-0.119741
chr21:8213886-8441312	59	no				no
chr3:71684572-71699708	59	no				yes
chr20:51674153-51690819	58	yes	ENSG00000054793.13	ATP9A		no	0.271068
chr10:69483691-69498396	58	yes	ENSG00000099282.9	TSPAN15		no	0.285552
chr22:41808875-41813822	58	yes	ENSG00000100147.13	CCDC134		yes	0.388894
chr18:12999421-13042334	58	yes	ENSG00000101639.18	CEP192		yes	0.686417
chrX:24809898-24843677	58	yes	ENSG00000101868.10	POLA1		no	0.128547
chr8:42325970-42329214	58	yes	ENSG00000104365.13	IKBKB		no	0.197995	ENST00000522147.4
chr4:185247294-185288082	58	yes	ENSG00000109762.15	SNX25		yes	0.527219
chr6:75634707-75678927	58	yes	ENSG00000112701.17	SENP6		no	0.0741048
chr1:13715541-13742157	58	yes	ENSG00000116731.22	PRDM2		yes	-0.149597
chr1:27789562-27793632	58	yes	ENSG00000117758.13	STX12		no	0.101639
chr5:40852174-40854096	58	no	ENSG00000132357.13	CARD6		no
chr8:99274198-99275254	58	yes	ENSG00000132549.18	VPS13B		no	-0.0962043
chr14:37817578-37874563	58	yes	ENSG00000139865.16	TTC6		no	0.0715118
chr2:100006632-100008932	58	yes	ENSG00000144218.18	AFF3		no	0.341664
chr11:13413530-13421838	58	yes	ENSG00000148925.10	BTBD10		yes	0.539067
chr3:146102755-146124229	58	yes	ENSG00000152952.11	PLOD2		yes	0.422362
chr2:183128287-183130545	58	yes	ENSG00000163002.12	NUP35		yes	0.545296
chr5:38990949-39021136	58	yes	ENSG00000164327.12	RICTOR		no	0.0856059
chr8:42906173-43018494	58	yes	ENSG00000168172.8	HOOK3		no	0.105178
chr15:65729072-65756472	58	yes	ENSG00000174485.14	DENND4A		yes	0.306099
chr18:13681605-13682105	58	yes	ENSG00000177150.12	FAM210A		yes	0.8777	ENST00000585785.1
chr13:45151687-45207505	58	yes	ENSG00000188342.11	GTF2F2		yes	0.784182
chr6:136694140-136698682	58	yes	ENSG00000197442.9	MAP3K5		no	0.356659
chr10:70152263-70161069	58	no				no
chr20:56468715-56474714	58	no				no
chr6:26877564-26877789	58	no				no
chr7:99493040-99494631	58	no				no
chrX:10063445-10079804	57	yes	ENSG00000047644.17	WWC3		yes	0.274603
chr3:179764002-179765848	57	yes	ENSG00000058056.8	USP13		no	0.386359
chr5:57246300-57247215	57	yes	ENSG00000062194.15	GPBP1		yes	0.309037
chr3:197130527-197149796	57	yes	ENSG00000075711.20	DLG1		no	0.336683
chr19:10795372-10798572	57	yes	ENSG00000079805.16	DNM2		no	-0.00157805
chr13:32732101-32746100	57	yes	ENSG00000083642.18	PDS5B		no	0.404169
chr18:56756583-56758953	57	yes	ENSG00000091157.13	WDR7		no	0.163012	ENST00000589935.1
chr7:99403398-99404953	57	yes	ENSG00000106244.12	PDAP1		no	0.197608
chr11:34957384-34984728	57	yes	ENSG00000110435.11	PDHX		no	0.254293
chr5:43295752-43297166	57	yes	ENSG00000112972.14	HMGCS1		no	0.262868
chr2:32377588-32395593	57	yes	ENSG00000115760.13	BIRC6		no	-0.0884498
chr9:121161856-121166180	57	yes	ENSG00000119397.16	CNTRL		yes	0.00401871
chr6:18256361-18258405	57	yes	ENSG00000124795.14	DEK		no	0.42504
chr11:9989497-10002689	57	yes	ENSG00000133812.14	SBF2		no	-0.096836
chr13:52397232-52398194	57	yes	ENSG00000136114.15	THSD1		no	0.149717
chr4:128074460-128098330	57	yes	ENSG00000138709.17	LARP1B		yes	0.202542
chr16:14627106-14627336	57	yes	ENSG00000140694.16	PARN		yes	0.134308	ENST00000539279.5
chr17:82900651-82911789	57	yes	ENSG00000141556.20	TBCD		no	0.179272
chr1:151024611-151025673	57	yes	ENSG00000143363.15	PRUNE		yes	0.225207	ENST00000462440.5
chr2:72731007-72733118	57	yes	ENSG00000144036.14	EXOC6B		no	0.104921
chr3:155910692-155925366	57	yes	ENSG00000163655.15	GMPS		no	0.56541
chr11:9047943-9053215	57	yes	ENSG00000175356.12	SCUBE2		no	0.167488	ENST00000450649.6
chr15:74926766-74929232	57	yes	ENSG00000178741.11	COX5A		yes	0.262445
chr10:12081472-12120267	57	yes	ENSG00000181192.11	DHTKD1		no	0.54727
chr21:37108392-37152029	57	yes	ENSG00000182670.13	TTC3		yes	-0.0162332
chr1:147966554-147969959	57	yes	ENSG00000188092.14	GPR89B		no	-0.227583
chr1:247159006-247159813	57	yes	ENSG00000196418.12	ZNF124		no	0.140262
chr14:30947090-30956242	57	yes	ENSG00000196792.11	STRN3		no	0.286874
chr2:206841107-206881891	57	no				no
chr13:77126318-77129230	56	yes	ENSG00000005810.17	MYCBP2		no	0.085583
chr5:137942875-137943216	56	yes	ENSG00000031003.10	FAM13B		no	0.0754023
chr11:74604692-74620089	56	yes	ENSG00000077514.8	POLD3		yes	0.114238
chr3:149846011-149895560	56	yes	ENSG00000082996.19	RNF13		yes	0.515276
chr15:49632159-49634794	56	yes	ENSG00000104047.14	DTWD1		no	0.0752948
chr10:115461941-115469329	56	yes	ENSG00000107518.16	ATRNL1		no	0.464356	ENST00000534530.5
chr4:102722871-102726683	56	yes	ENSG00000109323.8	MANBA		no	0.267857
chr4:1900626-1904378	56	yes	ENSG00000109685.17	WHSC1		yes	0.200374
chr6:75634707-75663518	56	yes	ENSG00000112701.17	SENP6		no	0.122616
chr1:155370504-155370983	56	yes	ENSG00000116539.10	ASH1L		no	0.0713331
chr1:24531218-24533254	56	yes	ENSG00000117602.11	RCAN3		yes	0.0449554	ENST00000374393.4
chr1:32030298-32038619	56	yes	ENSG00000121774.17	KHDRBS1		no	0.168942
chr7:33349068-33388144	56	yes	ENSG00000122507.20	BBS9		no	0.096847
chr4:6994184-7001251	56	yes	ENSG00000132405.18	TBC1D14		yes	0.240503
chr1:111147642-111161296	56	yes	ENSG00000134255.13	CEPT1		yes	0.158591
chr9:83677727-83686155	56	yes	ENSG00000135018.13	UBQLN1		no	0.390615
chr2:44209210-44218537	56	yes	ENSG00000138032.20	PPM1B		yes	-0.10951
chr10:87767673-87776427	56	yes	ENSG00000138138.13	ATAD1		no	0.424201
chr12:128808788-128815070	56	yes	ENSG00000139370.10	SLC15A4		yes	-0.0269174
chr14:102193463-102195120	56	yes	ENSG00000140153.17	WDR20		no	0.35303	ENST00000556511.2
chr17:29684563-29703062	56	yes	ENSG00000141298.17	SSH2		no	0.192187
chr1:154172908-154173201	56	yes	ENSG00000143549.19	TPM3		yes	0.304308	ENST00000509601.1
chr6:158583954-158589782	56	yes	ENSG00000146433.8	TMEM181		no	-0.0648986
chr8:17265907-17286427	56	yes	ENSG00000155975.9	VPS37A		no	0.13335
chr3:170122591-170126007	56	no	ENSG00000173889.15	PHC3		no
chr1:50539592-50596216	56	yes	ENSG00000185104.19	FAF1		no	0.659811
chr1:225231073-225266769	56	yes	ENSG00000185842.14	DNAH14		no	0.145846
chr11:103303093-103323990	56	yes	ENSG00000187240.13	DYNC2H1		no	0.241486	ENST00000334267.11
chr1:28473554-28474151	56	yes	ENSG00000204138.12	PHACTR4		no	0.0466716
chr10:20945338-20961779	56	no				no
chr12:120197352-120198699	56	no				yes
chr3:37275757-37276518	56	no				no
chr6:47526628-47554766	56	no				no
chr8:115502349-115502534	56	no				no
chr10:5785142-5800705	55	yes	ENSG00000057608.16	GDI2		no	0.591326
chr10:20880794-20899450	55	no	ENSG00000078114.18	NEBL		yes
chr17:28163543-28172618	55	yes	ENSG00000087095.12	NLK		no	-0.0130075
chr18:21765772-21791557	55	yes	ENSG00000101752.11	MIB1		no	0.221112
chr2:147972739-147975975	55	yes	ENSG00000115947.13	ORC4		yes	0.0675701	ENST00000536575.5
chr1:155820606-155827028	55	yes	ENSG00000116580.18	GON4L		no	-0.185298
chr2:199368605-199433514	55	yes	ENSG00000119042.16	SATB2		no	0.65551
chr2:23880639-23885829	55	yes	ENSG00000119778.14	ATAD2B		no	-0.238186
chr20:2986765-2988474	55	yes	ENSG00000132670.20	PTPRA		no	0.497896
chr11:36393846-36403378	55	yes	ENSG00000135362.13	PRR5L		yes	0.248851	ENST00000389693.3
chr10:17704431-17705741	55	yes	ENSG00000136738.14	STAM		no	0.00589291
chr4:82871944-82875822	55	yes	ENSG00000138674.16	SEC31A		no	0.312711
chr2:44704283-44715353	55	yes	ENSG00000143919.14	CAMKMT		no	-0.113819
chr7:139398599-139407350	55	yes	ENSG00000146963.17	C7orf55-LUC7L2		no	-0.0929413
chrX:118584735-118590302	55	yes	ENSG00000147251.15	DOCK11		no	0.363486
chr9:133412299-133412921	55	yes	ENSG00000148300.11	REXO4		no	0.0667243	ENST00000371935.6
chr2:229836848-229880128	55	yes	ENSG00000153827.13	TRIP12		yes	0.381277
chr3:16301626-16302748	55	yes	ENSG00000154814.13	OXNAD1		no	0.296949
chr7:139266333-139272440	55	yes	ENSG00000157741.14	UBN2		no	-0.0894787
chr1:58671870-58685251	55	yes	ENSG00000162601.9	MYSM1		no	0.125691
chr3:47736034-47772936	55	yes	ENSG00000173473.10	SMARCC1		no	0.44598
chr17:80289659-80290728	55	yes	ENSG00000173821.19	RNF213		no	0.181943
chr7:35010468-35018596	55	yes	ENSG00000173852.13	DPY19L1		no	0.650686
chr3:175096790-175097291	55	yes	ENSG00000177694.14	NAALADL2		no	0.363093
chr1:224952670-225023865	55	yes	ENSG00000185842.14	DNAH14		yes	0.177968
chr20:34714590-34715365	55	yes	ENSG00000198646.13	NCOA6		no	-0.204978	ENST00000628752.2
chr11:65499792-65500012	55	no				no
chr3:49967470-49975392	54	yes	ENSG00000004534.14	RBM6		yes	-0.0121855	ENST00000419610.5
chr7:152220523-152238826	54	yes	ENSG00000055609.17	KMT2C		no	-0.272687
chr12:26996742-26999676	54	yes	ENSG00000064115.10	TM7SF3		no	0.213413	ENST00000535819.1
chr8:42344953-42357392	54	yes	ENSG00000070501.11	POLB		no	0.331333
chr1:21050866-21111383	54	yes	ENSG00000075151.19	EIF4G3		no	0.0661034
chr2:71363153-71370005	54	yes	ENSG00000075292.18	ZNF638		no	0.0767542
chr20:21326279-21368590	54	yes	ENSG00000088930.7	XRN2		no	0.386894
chr20:16356330-16381747	54	yes	ENSG00000089177.17	KIF16B		no	0.682007
chr22:21799012-21807846	54	yes	ENSG00000100030.14	MAPK1		no	0.205703
chr14:22926133-22927660	54	yes	ENSG00000100462.15	PRMT5		no	0.248759	ENST00000554716.5
chr16:17258988-17259498	54	yes	ENSG00000103489.11	XYLT1		no	-0.114582
chr12:70278132-70319364	54	yes	ENSG00000111596.11	CNOT2		yes	-0.0448494
chr2:73432198-73455295	54	yes	ENSG00000116127.17	ALMS1		no	0.203393
chr1:171579354-171587751	54	yes	ENSG00000117523.15	PRRC2C		no	0.121667
chr6:89862126-89871388	54	yes	ENSG00000118412.12	CASP8AP2		no	0.468605
chr6:108663455-108664889	54	yes	ENSG00000118689.14	FOXO3		yes	-0.0654305
chr20:48953556-48963898	54	yes	ENSG00000124198.8	ARFGEF2		no	0.211348
chr20:49066192-49070297	54	yes	ENSG00000124207.16	CSE1L		no	0.479553
chr9:19286769-19305527	54	yes	ENSG00000137145.20	DENND4C		no	-0.122653
chr2:203366877-203427269	54	yes	ENSG00000138443.15	ABI2		yes	-0.00100018
chr10:34359147-34384254	54	yes	ENSG00000148498.15	PARD3		yes	0.121774
chr4:128936655-129003876	54	yes	ENSG00000151466.11	SCLT1		no	0.227522	ENST00000439369.6
chr16:56385919-56389375	54	yes	ENSG00000159461.14	AMFR		no	0.219893	ENST00000568762.1
chr1:62444738-62447511	54	yes	ENSG00000162607.12	USP1		no	0.641201
chr3:47729025-47772936	54	yes	ENSG00000173473.10	SMARCC1		no	0.431391
chr1:77858938-77866391	54	yes	ENSG00000180488.14	FAM73A		no	-0.0711385
chr12:99772922-99806700	54	yes	ENSG00000185046.18	ANKS1B		no	0.224367	ENST00000547010.5
chr14:71400794-71418196	54	yes	ENSG00000197555.9	SIPA1L1		no	0.0342412	ENST00000557151.5
chr6:47607927-47612536	54	yes	ENSG00000198087.7	CD2AP		no	0.138637
chr12:111482787-111486824	54	yes	ENSG00000204842.14	ATXN2		no	-0.151638
chr6:592468-599224	54	no				no
chr7:92213195-92226682	53	yes	ENSG00000001631.14	KRIT1		no	-0.0280592
chr10:69483691-69485215	53	yes	ENSG00000099282.9	TSPAN15		no	0.743674
chr16:23102319-23108183	53	yes	ENSG00000103404.14	USP31		no	0.22994
chr15:50300789-50309798	53	yes	ENSG00000104064.16	GABPB1		yes	0.329102
chr8:97805353-97825153	53	yes	ENSG00000104341.16	LAPTM4B		no	0.429769
chr7:103319609-103322794	53	yes	ENSG00000105821.14	DNAJC2		no	0.598856
chr17:39708321-39710481	53	yes	ENSG00000141736.13	ERBB2	yes	no	0.966791	ENST00000445658.6
chr10:67954595-68014186	53	yes	ENSG00000148634.15	HERC4		no	0.0263183
chr5:122019260-122022407	53	yes	ENSG00000151304.5	SRFBP1		no	0.416312
chr5:50778069-50797233	53	yes	ENSG00000151883.16	PARP8		yes	0.285994
chr2:134253095-134270550	53	yes	ENSG00000152127.8	MGAT5		yes	0.516675
chr7:140794308-140808995	53	yes	ENSG00000157764.12	BRAF	yes	no	0.0176678
chr3:155910692-155914570	53	yes	ENSG00000163655.15	GMPS		no	0.420425
chr11:28211062-28230985	53	no	ENSG00000169519.19	METTL15		no
chr3:197866112-197871462	53	yes	ENSG00000186001.12	LRCH3		no	0.0463402
chr5:145817894-145826200	53	yes	ENSG00000186314.11	PRELID2		yes	0.459642
chr10:7367649-7370375	53	yes	ENSG00000198879.11	SFMBT2		no	-0.0813199
chr1:197583152-197611976	53	yes	ENSG00000213047.11	DENND1B		no	0.388313
chr7:66808886-66810847	53	no	ENSG00000243335.8	KCTD7		no
chr10:94030683-94032252	53	no				yes
chr5:134157707-134174022	53	no				yes
chr6:44253076-44253272	53	no				no
chr17:48112031-48113401	52	yes	ENSG00000002919.14	SNX11		yes	0.333401
chr3:169976946-169988359	52	yes	ENSG00000008952.16	SEC62		no	0.386237
chr8:73673107-73739868	52	yes	ENSG00000040341.17	STAU2		yes	0.0846722	ENST00000523558.5
chr9:100441906-100442356	52	yes	ENSG00000066697.14	MSANTD3		yes	0.274033
chr3:3137260-3140648	52	yes	ENSG00000072756.16	TRNT1		no	0.545332
chr1:1804419-1817875	52	yes	ENSG00000078369.17	GNB1		yes	0.191957
chr10:28583399-28590832	52	yes	ENSG00000095787.21	WAC		no	0.312005
chr22:41808875-41810291	52	yes	ENSG00000100147.13	CCDC134		yes	0.493516
chr14:53091785-53103856	52	yes	ENSG00000100523.14	DDHD1		no	0.185425
chr12:46229153-46254936	52	yes	ENSG00000111371.15	SLC38A1		yes	0.597661
chr1:231537213-231542611	52	yes	ENSG00000116918.13	TSNAX		no	-0.119433	ENST00000602885.5
chr1:171568247-171575128	52	yes	ENSG00000117523.15	PRRC2C		no	0.111059
chr9:85618983-85633374	52	yes	ENSG00000135049.15	AGTPBP1		no	0.404981
chr9:104750956-104759171	52	yes	ENSG00000136783.9	NIPSNAP3A		no	0.213003
chr3:188609161-188609844	52	yes	ENSG00000145012.12	LPP		no	0.12702
chr4:53425872-53428183	52	yes	ENSG00000145216.15	FIP1L1		no	0.095674
chr5:103096541-103097781	52	yes	ENSG00000145723.16	GIN1		no	0.582824	ENST00000508629.5
chr11:108227595-108235834	52	yes	ENSG00000149311.17	ATM	yes	yes	0.0924338
chr18:68897219-68897682	52	no	ENSG00000150636.15	CCDC102B		no
chr2:101281859-101295181	52	yes	ENSG00000163162.8	RNF149		no	0.0586004
chr5:95736889-95783963	52	yes	ENSG00000164292.12	RHOBTB3		yes	0.517043
chr8:47700403-47702015	52	yes	ENSG00000164808.16	SPIDR		no	0.00492156
chr15:85684741-85710645	52	yes	ENSG00000170776.19	AKAP13		no	0.0692986
chr7:64543707-64544432	52	yes	ENSG00000173041.11	ZNF680		no	0.518616
chr1:58527261-58539310	52	no	ENSG00000173406.15	DAB1		yes
chr7:44798748-44799874	52	yes	ENSG00000196262.13	PPIA		yes	0.498485	ENST00000479021.1
chr6:47574064-47582065	52	yes	ENSG00000198087.7	CD2AP		no	0.271339
chr11:65499691-65499915	52	no				no
chr11:65499766-65499981	52	no				no
chr17:78004170-78031842	52	no				no
chr18:6462759-6462994	52	no				no
chr19:46918488-46922356	52	no				yes
chr7:140334679-140337349	52	no				no
chr9:33293680-33295427	52	no				no
chr7:105073619-105081797	51	yes	ENSG00000005483.19	KMT2E		no	0.330406
chr14:65430216-65455718	51	yes	ENSG00000033170.16	FUT8		no	0.0247091	ENST00000394586.6
chr2:182952405-182953331	51	yes	ENSG00000061676.14	NCKAP1		no	0.318185
chr11:85990250-86031611	51	yes	ENSG00000073921.17	PICALM		yes	0.317191
chrX:107840670-107854704	51	yes	ENSG00000080561.13	MID2		no	0.674076
chr17:28122603-28172618	51	yes	ENSG00000087095.12	NLK		no	0.0658101
chr7:156724112-156826744	51	yes	ENSG00000105983.19	LMBR1		yes	0.202715
chr7:148846470-148847305	51	yes	ENSG00000106462.10	EZH2		yes	0.492548
chr5:136147832-136154163	51	yes	ENSG00000113658.16	SMAD5		yes	0.218329	ENST00000514777.1
chr7:33357855-33388144	51	yes	ENSG00000122507.20	BBS9		no	0.23875
chr20:3907926-3912634	51	yes	ENSG00000125779.21	PANK2		yes	0.0347315
chr9:135850137-135866536	51	yes	ENSG00000130559.18	CAMSAP1		yes	0.392844
chr22:45689712-45740538	51	yes	ENSG00000130638.15	ATXN10		no	0.46463
chr19:10163326-10177367	51	yes	ENSG00000130816.14	DNMT1		no	0.00693114
chr1:40064227-40064559	51	yes	ENSG00000131236.16	CAP1		no	0.364322	ENST00000414893.5
chr5:139614586-139614966	51	yes	ENSG00000131508.15	UBE2D2		yes	0.141305
chr1:61856030-61884408	51	yes	ENSG00000132849.18	INADL		no	0.0348208
chr5:55960402-55968396	51	yes	ENSG00000134352.19	IL6ST		no	0.270487	ENST00000381286.7
chr2:214780560-214797117	51	yes	ENSG00000138376.10	BARD1		no	0.497158	ENST00000613374.4
chr12:19473248-19500221	51	yes	ENSG00000139154.14	AEBP2		no	0.491434
chr1:176081152-176136547	51	yes	ENSG00000143207.19	RFWD2		no	0.461019
chr3:4410865-4420146	51	yes	ENSG00000144455.13	SUMF1		no	0.438922
chr11:86306245-86306482	51	yes	ENSG00000149196.15	C11orf73		yes	0.248052	ENST00000531485.5
chr12:32305697-32306122	51	yes	ENSG00000151746.13	BICD1		no	0.012915
chr10:118729295-118730410	51	yes	ENSG00000151893.14	CACUL1		no	0.150054
chr10:72708283-72715902	51	yes	ENSG00000156026.14	MCU		no	0.339546	ENST00000373053.7
chr1:222724092-222725555	51	yes	ENSG00000162819.11	BROX		no	-0.063743
chr1:246548545-246556721	51	yes	ENSG00000162851.7	TFB2M		no	0.0259535
chr3:56669700-56673725	51	yes	ENSG00000163946.13	FAM208A		no	-0.0227956
chr3:57583898-57584464	51	yes	ENSG00000168374.10	ARF4		no	0.149065	ENST00000489843.1
chr3:47622207-47678311	51	yes	ENSG00000173473.10	SMARCC1		no	-0.0911111
chr3:170145423-170178938	51	yes	ENSG00000173889.15	PHC3		yes	0.152183
chr14:39151746-39159550	51	yes	ENSG00000182400.14	TRAPPC6B		no	0.223262
chr9:22046751-22097364	51	yes	ENSG00000240498.6	CDKN2B-AS1		no	0.246762
chr11:65500108-65500318	51	no				no
chr11:92352096-92355404	51	no				yes
chr19:9652953-9660874	51	no				yes
chr5:123532569-123557564	51	no				yes
chr6:75177730-75177933	51	no				no
chr7:94430663-94430938	51	no				no
chr9:98011269-98015412	51	no				no
chr12:813642-830160	50	yes	ENSG00000060237.16	WNK1		no	0.653048
chr14:92093252-92096838	50	yes	ENSG00000066427.21	ATXN3		no	-0.122585	ENST00000557311.5
chr17:4066447-4072756	50	yes	ENSG00000074755.14	ZZEF1		no	0.054874
chr14:73147795-73148094	50	yes	ENSG00000080815.18	PSEN1		yes	0.306496
chr4:139695197-139704196	50	yes	ENSG00000085871.8	MGST2		no	0.515996
chr14:76166663-76180849	50	yes	ENSG00000089916.17	GPATCH2L		yes	-0.139315
chr20:35366557-35384133	50	yes	ENSG00000101019.21	UQCC1		yes	0.228062
chr13:37040405-37051583	50	yes	ENSG00000102710.19	SUPT20H		yes	0.00611634
chr13:41811225-41819386	50	yes	ENSG00000102763.15	VWA8		no	0.158466
chr16:14644274-14644609	50	yes	ENSG00000103429.10	BFAR		yes	0.216261
chr15:44550876-44551522	50	yes	ENSG00000104131.12	EIF3J		no	0.431443	ENST00000424492.7
chr7:24620052-24668660	50	yes	ENSG00000105926.15	MPP6		yes	0.543667
chr2:70224554-70236175	50	yes	ENSG00000116001.15	TIA1		no	-0.21393
chr13:45985297-46020557	50	yes	ENSG00000123200.16	ZC3H13		no	0.136378
chr9:33971651-33973237	50	yes	ENSG00000137073.20	UBAP2		no	-0.168905	ENST00000539807.5
chr4:128074460-128091512	50	yes	ENSG00000138709.17	LARP1B		yes	0.24941
chr15:90486954-90492711	50	yes	ENSG00000140575.12	IQGAP1		no	0.226647
chr18:49331864-49379758	50	yes	ENSG00000141627.13	DYM		yes	0.275858	ENST00000442713.6
chr1:84179177-84214317	50	yes	ENSG00000142875.19	PRKACB		yes	0.666383
chr2:32174063-32184338	50	yes	ENSG00000152683.14	SLC30A6		yes	0.0947186	ENST00000449777.5
chr6:128218922-128242602	50	yes	ENSG00000152894.14	PTPRK		no	0.660838
chr9:74996447-75017448	50	yes	ENSG00000156017.12	C9orf41		no	0.154417
chr3:111112030-111147484	50	yes	ENSG00000177707.10	PVRL3		no	0.150744
chr12:124419957-124430787	50	yes	ENSG00000196498.13	NCOR2		no	0.0166246
chr6:75817501-75832947	50	yes	ENSG00000196586.13	MYO6		yes	0.214447
chr16:21612645-21625115	50	yes	ENSG00000197006.13	METTL9		no	0.457538
chr9:110972073-111011690	50	no	ENSG00000198121.13	LPAR1		yes
chr1:117460489-117502970	50	yes	ENSG00000198162.12	MAN1A2		no	0.358364
chr2:168129541-168182090	50	yes	ENSG00000198648.10	STK39		no	0.186755
chr5:170878097-170924550	50	yes	ENSG00000204764.12	RANBP17		no	0.128852
chr12:55789075-55803728	50	yes	ENSG00000205323.8	SARNP		no	-0.0945399
chr11:65499046-65499274	50	no				no
chr14:65432037-65455718	50	no				no
chr9:83975747-83976994	50	no				no
chr15:52584745-52593736	49	yes	ENSG00000047346.12	FAM214A		no
chr1:243304713-243426558	49	yes	ENSG00000054282.15	SDCCAG8		no
chr5:57230846-57231321	49	yes	ENSG00000062194.15	GPBP1		no
chr17:60460663-60462061	49	yes	ENSG00000062725.9	APPBP2		no		ENST00000592995.1
chr11:85974708-86031611	49	yes	ENSG00000073921.17	PICALM		yes
chr11:118583179-118584644	49	yes	ENSG00000095139.13	ARCN1		no		ENST00000534182.2
chr13:95970112-95996135	49	yes	ENSG00000102595.18	UGGT2		no		ENST00000621375.4
chr17:62010550-62063301	49	yes	ENSG00000108510.9	MED13		no
chr17:55401469-55403868	49	yes	ENSG00000108960.7	MMD		no
chr17:32173831-32176213	49	yes	ENSG00000126858.16	RHOT1		no		ENST00000580976.1
chr3:194459471-194462236	49	yes	ENSG00000133657.14	ATP13A3		yes
chr11:128484823-128490576	49	yes	ENSG00000134954.14	ETS1		no		ENST00000535549.5
chr16:66730112-66732505	49	no	ENSG00000135720.12	DYNC1LI2		no
chr4:169507037-169537911	49	yes	ENSG00000137601.15	NEK1		no
chr12:32598497-32611283	49	yes	ENSG00000139132.14	FGD4		no
chr1:154251041-154257434	49	yes	ENSG00000143569.18	UBAP2L		no
chr6:125045211-125058106	49	yes	ENSG00000146373.16	RNF217		no
chr1:174272414-174305127	49	yes	ENSG00000152061.21	RABGAP1L		no
chr17:56844019-56848065	49	yes	ENSG00000153933.9	DGKE		no
chr20:49639678-49640665	49	yes	ENSG00000158470.5	B4GALT5		no
chrX:135545423-135552146	49	yes	ENSG00000165359.14	DDX26B		no
chr8:51845661-51861246	49	yes	ENSG00000168300.13	PCMTD1		yes		ENST00000519975.1
chr8:105419144-105444381	49	yes	ENSG00000169946.13	ZFPM2		no
chr3:47635190-47636136	49	yes	ENSG00000173473.10	SMARCC1		no
chr1:50655442-50744775	49	yes	ENSG00000185104.19	FAF1		no
chr2:110454851-110455555	49	yes	ENSG00000257207.5	AC108938.5		no
chr11:31452718-31463305	49	no				yes
chr11:65499645-65499935	49	no				no
chr6:82214227-82214829	48	yes	ENSG00000005700.14	IBTK		no		ENST00000503631.5
chr17:12081356-12095694	48	yes	ENSG00000065559.14	MAP2K4	yes	no
chr1:93876268-93877862	48	yes	ENSG00000067334.13	DNTTIP2		no
chr15:50631417-50663046	48	yes	ENSG00000092439.13	TRPM7		no
chr19:45025329-45025737	48	yes	ENSG00000104856.13	RELB		no
chr17:27303367-27309272	48	yes	ENSG00000109046.14	WSB1		no
chr4:102580535-102582957	48	yes	ENSG00000109320.11	NFKB1		no
chr6:75702645-75711416	48	yes	ENSG00000112701.17	SENP6		no
chr12:26550247-26602706	48	yes	ENSG00000123104.11	ITPR2		no
chr1:30992390-31007102	48	yes	ENSG00000134644.15	PUM1		no		ENST00000424085.6
chr9:33953285-33973237	48	yes	ENSG00000137073.20	UBAP2		no
chr10:68459104-68470163	48	yes	ENSG00000138346.14	DNA2		no
chr18:12366965-12371691	48	yes	ENSG00000141385.9	AFG3L2		no
chr17:82763965-82772507	48	yes	ENSG00000141556.20	TBCD		no
chr1:151088190-151118139	48	no	ENSG00000143458.11	GABPB2		yes
chr5:129526284-129528677	48	yes	ENSG00000145808.8	ADAMTS19		no
chr10:93676653-93687449	48	yes	ENSG00000148690.11	FRA10AC1		no
chr11:6941571-6955782	48	yes	ENSG00000149054.14	ZNF215		no
chr10:60084602-60085253	48	yes	ENSG00000151150.20	ANK3		no
chr11:14771937-14789242	48	yes	ENSG00000152270.8	PDE3B		no
chr21:29326059-29329693	48	yes	ENSG00000156273.15	BACH1		no
chr1:151166934-151167414	48	yes	ENSG00000163156.11	SCNM1		no
chr3:67495798-67529186	48	yes	ENSG00000172340.14	SUCLG2		no
chr16:88027483-88038011	48	yes	ENSG00000172530.19	BANP		no
chr3:170136419-170178938	48	yes	ENSG00000173889.15	PHC3		yes
chr3:47097955-47103423	48	yes	ENSG00000181555.19	SETD2	yes	no
chr1:145839890-145842477	48	no	ENSG00000186141.8	POLR3C		no
chr2:155809928-155914227	48	no				no
chr2:215397196-215397822	48	no				no
chr5:71035545-71042284	48	no				no
chr6:77271340-77273307	48	no				no
chr13:77217840-77243951	47	yes	ENSG00000005810.17	MYCBP2		no
chr10:121538592-121565704	47	yes	ENSG00000066468.20	FGFR2	yes	no
chr4:39737420-39755739	47	yes	ENSG00000078140.13	UBE2K		no		ENST00000510719.1
chr9:27009020-27029104	47	yes	ENSG00000096872.15	IFT74		no
chr10:35060874-35071339	47	yes	ENSG00000108094.14	CUL2		yes
chr12:122511109-122515227	47	yes	ENSG00000111011.17	RSRC2		no
chr2:10644320-10668723	47	yes	ENSG00000115761.15	NOL10		no
chr13:20002850-20006586	47	yes	ENSG00000121741.16	ZMYM2		no
chr1:32030298-32045390	47	yes	ENSG00000121774.17	KHDRBS1		no
chr13:52417992-52427219	47	yes	ENSG00000136100.12	VPS36		no
chr2:214745067-214769312	47	yes	ENSG00000138376.10	BARD1		no		ENST00000613192.1
chr15:89113725-89155534	47	yes	ENSG00000140526.16	ABHD2		yes
chr7:55982210-55983868	47	yes	ENSG00000146729.9	GBAS		no
chr13:40559509-40560860	47	yes	ENSG00000150907.6	FOXO1		no
chr4:17501719-17509363	47	yes	ENSG00000151552.11	QDPR		no
chr13:28256292-28281379	47	yes	ENSG00000152520.13	PAN3		no
chr2:86740927-86753558	47	yes	ENSG00000153561.12	RMND5A		no
chr15:49235851-49239367	47	yes	ENSG00000156958.14	GALK2		no
chr2:101257791-101262691	47	yes	ENSG00000158435.7	CNOT11		no
chr21:33421480-33432871	47	yes	ENSG00000159128.14	IFNGR2		yes
chr1:212863725-212872818	47	yes	ENSG00000162769.12	FLVCR1		no
chr11:43326507-43335994	47	yes	ENSG00000166181.12	API5		no		ENST00000534695.5
chr5:113001084-113001674	47	yes	ENSG00000172795.15	DCP2		no
chr2:30525587-30533314	47	yes	ENSG00000172954.13	LCLAT1		yes
chr6:109145219-109146937	47	yes	ENSG00000183137.14	CEP57L1		yes
chr14:49709159-49743805	47	yes	ENSG00000197776.7	KLHDC1		no
chr6:154773989-154833409	47	no	ENSG00000213079.9	SCAF8		no
chr10:32543300-32635158	47	no	ENSG00000216937.11	CCDC7		yes
chr19:52383849-52385324	47	no	ENSG00000221923.8	ZNF880		no
chr8:72052539-72076627	47	yes	ENSG00000235531.9	MSC-AS1		yes
chr1:103565435-103575540	47	yes	ENSG00000240038.6	AMY2B		yes
chr19:11722954-11725327	47	no				no
chr2:233275728-233275963	47	no				no
chr1:112555868-112616895	46	yes	ENSG00000007341.18	ST7L		yes
chr10:1072116-1096246	46	yes	ENSG00000047056.14	WDR37		yes
chr1:243293091-243378863	46	yes	ENSG00000054282.15	SDCCAG8		no
chr1:92693802-92704744	46	yes	ENSG00000067208.14	EVI5		no
chr3:172226871-172251541	46	yes	ENSG00000075420.12	FNDC3B		no
chr20:37066724-37068186	46	yes	ENSG00000080839.11	RBL1		no
chr6:35637014-35646850	46	no	ENSG00000096060.14	FKBP5		yes
chr9:5021963-5055788	46	yes	ENSG00000096968.12	JAK2		yes
chr4:102689574-102714561	46	yes	ENSG00000109323.8	MANBA		no
chr1:232513857-232533583	46	no	ENSG00000116991.10	SIPA1L2		yes
chr13:46003139-46045513	46	yes	ENSG00000123200.16	ZC3H13		yes
chr6:7181124-7189322	46	yes	ENSG00000124782.19	RREB1		yes
chr17:75242336-75243570	46	yes	ENSG00000125447.16	GGA3		yes
chr20:35713019-35725155	46	yes	ENSG00000131051.20	RBM39		no
chr18:36142281-36160015	46	yes	ENSG00000134759.13	ELP2		no		ENST00000540799.1
chr2:214752447-214797117	46	yes	ENSG00000138376.10	BARD1		no		ENST00000613192.1
chr12:11869424-11869969	46	yes	ENSG00000139083.10	ETV6		no
chr14:37285318-37308519	46	yes	ENSG00000151338.18	MIPOL1		no		ENST00000555870.5
chr2:229858772-229860531	46	yes	ENSG00000153827.13	TRIP12		no		ENST00000389045.7
chr7:137645472-137690002	46	yes	ENSG00000157680.15	DGKI		no
chr6:18159883-18166378	46	yes	ENSG00000165097.13	KDM1B		yes		ENST00000546309.6
chr15:43753824-43756766	46	yes	ENSG00000167004.12	PDIA3		no
chr19:41248514-41248820	46	yes	ENSG00000167601.11	AXL		no
chr3:56563684-56571302	46	yes	ENSG00000180376.16	CCDC66		yes
chr16:14079290-14140760	46	yes	ENSG00000186260.16	MKL2		yes
chr2:28783907-28788809	46	yes	ENSG00000213639.9	PPP1CB		no
chr14:67685015-67690421	46	no	ENSG00000258466.5	RP11-1012A1.4		no		ENST00000553816.5
chr1:147252623-147259918	46	no	ENSG00000273071.1	RP11-337C18.10		yes		ENST00000369259.4
chr3:51541589-51590559	46	no				yes
chr6:151611371-151611706	46	no				no
chr3:27411642-27452498	45	yes	ENSG00000033867.16	SLC4A7		no
chr5:65451475-65452918	45	yes	ENSG00000049192.14	ADAMTS6		no
chr12:79793863-79822190	45	yes	ENSG00000058272.15	PPP1R12A		no
chr13:72835243-72931267	45	yes	ENSG00000083535.15	PIBF1		yes
chr4:2949934-2951245	45	yes	ENSG00000087269.15	NOP14		no
chr12:111679151-111683307	45	yes	ENSG00000089234.15	BRAP		yes
chr6:151944173-152011794	45	yes	ENSG00000091831.21	ESR1	yes	no		ENST00000406599.5
chr13:111205289-111233293	45	yes	ENSG00000102606.17	ARHGEF7		yes
chr1:232513857-232515608	45	yes	ENSG00000116991.10	SIPA1L2		yes
chr19:5016257-5041251	45	yes	ENSG00000127663.14	KDM4B		yes
chr15:62033441-62044255	45	yes	ENSG00000129003.15	VPS13C		no
chr14:34593045-34609742	45	yes	ENSG00000129515.18	SNX6		yes
chr4:95104408-95125121	45	yes	ENSG00000138696.10	BMPR1B		yes
chr14:37748939-37753235	45	yes	ENSG00000139865.16	TTC6		no		ENST00000533625.5
chr17:66175044-66183307	45	yes	ENSG00000154240.16	CEP112		yes
chr12:50427762-50430570	45	yes	ENSG00000161813.20	LARP4		yes
chr4:76396269-76403280	45	yes	ENSG00000163749.17	CCDC158		yes
chr15:44331988-44380976	45	yes	ENSG00000166734.18	CASC4		no
chr3:179378341-179392104	45	no	ENSG00000171109.18	MFN1		no
chr1:58506060-58534331	45	no	ENSG00000173406.15	DAB1		no
chr15:66535933-66546705	45	yes	ENSG00000174442.11	ZWILCH		no
chr10:12081472-12091684	45	yes	ENSG00000181192.11	DHTKD1		no
chr17:81855142-81855586	45	yes	ENSG00000185624.14	P4HB		no		ENST00000576052.1
chr8:63186147-63187745	45	yes	ENSG00000185728.16	YTHDF3		yes		ENST00000517371.5
chr6:30670410-30671274	45	yes	ENSG00000204560.9	DHX16		no
chr10:49500537-49506011	45	no				no
chr11:65430769-65437657	45	no				no
chr12:998324-1028572	45	no				yes
chr14:33925618-33931215	45	no				no
chr18:63280887-63281214	45	no				no
chr7:153731670-153736244	45	no				no
chr6:111405470-111472140	44	yes	ENSG00000009413.15	REV3L		yes
chr14:60796217-60818847	44	yes	ENSG00000020426.10	MNAT1		no
chr13:42285986-42308609	44	yes	ENSG00000023516.8	AKAP11		yes
[truncated: 93,844 more rows]

## Sheet: Add.Table 2 - primer sequences
Gene symbol	Gene name	Assay description	Sequence forward primer	Sequence reverse primer	Quantitative probe	SIZE
CNOT2	CCR4-NOT transcription complex subunit 2	CNOT2 2>3	TCCACATCGGTCAGAAAAAGAT	GAGGCAATCAAATAGAACTGTCACT		89 / 155
CNOT2	CCR4-NOT transcription complex subunit 2	CNOT2 2>3 P_MGB	CGACAGTGACTACCATGACGAAA	CAAGGGTCGTGTCACAGGAAG	6-FAM MGBNFQ CGTCTCCCTATCTTTTT	115
CNOT2	CCR4-NOT transcription complex subunit 2	CNOT2 2>3 option 2	CGACAGTGACTACCATGACGAAA	GAGGCAATCAAATAGAACTGTCACT		140 / 206
CNOT2	CCR4-NOT transcription complex subunit 2	linear CNOT2	Proprietary ThermoFisher exon 4->5, Assay Hs00248093_m1			108
RERE	arginine-glutamic acid dipeptide repeats	RERE 8>5	TCACACAAAGCAGGAGTTGGA	GCCCGAGTGGATTCATTTTT		100
CREBBP	CREB binding protein	CREBBP 2>2	CCAAGTCAAACAATGATCCAAAA	GCAGGTTTCCCCGCAAA		91
CREBBP	CREB binding protein	CREBBP 2>2 P_MGB	TGGGTATCAGCTCATCAGGAAG	TTTCCCCGCAAATGACTGGTC	6-FAM MGBEDQ GGCCAAGATTTTGGATC	116
HMBS	hydroxymethylbilane synthase	HMBS 1>4	CATGTCTGGTAACGGCAATG	GTACGAGGCTTTCAATGTTG		139
HPRT1	hypoxanthine phosphoribosyltransferase 1	HPRT1 3/4>7	TATTGTAATGACCAGTCAACAG	GGTCCTTTTCACCAGCAAG		192
TBP	TATA box binding protein	TBP 3>4	TTCGGAGAGTTCTGGGATTG	ACGAAGTGCAATGGTCTTTAG		94

## Sheet: Add.Table 3 - Clinical characte
		1st line aromatase inhibitor					1st line tamoxfen
Clinical parameters			CNOT2 2_3					CNOT2 2_3
		Count	Median	IQR [25-75 percentile]	P-value		Count	Median	IQR [25-75 percentile]	P-value
ALL		84	-6.66688	1.15257			295	-6.67189	1.87777
ESR1	ESR1 negative	0			0.38*		0		0	0.24*
	ESR1 positive	84	-6.66688	1.15257			295	-6.67189	1.87777
PGR	PGR negative	14	-6.01961	1.41216	0.49*		62	-6.71218	2.05019	0.37*
	PGR positive	70	-6.73179	1.06051			232	-6.6719	1.70199
ERBB2	ERBB2 unamplified	75	-6.62182	1.21468	0.12**		257	-6.67189	1.83934	0.88**
	ERBB2 amplified	9	-6.88502	0.660203			36	-6.77568	1.80791
Age at primary surgery	<= 40	2	-5.77607	1.75253	0.23*		30	-6.69116	1.80191	0.056
	>40 - <= 50	9	-6.0133	1.82408			64	-6.70446	2.01337
	>50 - <= 70	15	-6.62182	2.00295			144	-6.86249	1.79348
	>70	3	-7.75405	3.80505			57	-6.08754	1.90427
Menopausal status at primary surgery	pre-menopausal	11	-5.87137	1.75253	0.41**		110	-6.64233	1.84804	0.48**
	post-menopausal	17	-6.74479	1.98423			185	-6.67506	1.81266
T-status	pT1; <= 2 cm	23	-6.75503	1.03697	0.031***		73	-6.81791	1.87777	0.30***
	pT2; > 2 cm & <= 5 cm	44	-6.76974	1.20914			172	-6.62715	1.61599
	pT3; > 5 cm	16	-6.01867	1.41018			24	-7.36401	2.08405
	pT4; tumor at any size with direct extension to chest wall and/or skin	1	-7.02317	0			17	-6.25231	2.0582
N-status	No lymph nodes	20	-7.04876	0.780461	0.009***		125	-6.70727	1.79756	0.79***
	Positive lymph nodes	47	-6.57773	1.08158			108	-6.64233	1.79474
	Tumor outside lymph nodes	14	-5.91781	1.96431			49	-6.25908	1.82623
	Not applicable (M1)	2	-6.37726	0.608308			13	-7.17694	2.76223
M-status	no distant metastasis	76	-6.68185	1.18611	0.58**		264	-6.67348	1.81228	0.58**
	distant metastasis	7	-6.64847	0.694016			27	-7.17694	2.76223
Pathological tumor classification	pT1; <= 2 cm	23	-6.75503	1.03697	0.026***		73	-6.81791	1.87777	0.60***
	pT2; > 2 cm & <= 5 cm	44	-6.76974	1.20914			181	-6.61658	1.62965
	pT3; > 5 cm	17	-6.07311	1.35275			41	-6.93718	2.40442
Grade	poor	30	-6.66688	1.05229	0.56***		160	-6.62715	1.83316	0.31***
	unknown	4	-6.29041	1.64076			92	-7.00813	2.14066
	moderate/good	43	-6.75503	1.42293			43	-6.53206	1.46126
Adjvant chemotherapy	no adjuvant chemo	67	-6.71879	1.12976	0.020**		240	-6.6656	1.89907	0.33**
	adjuvant chemo	17	-6.0133	1.60082			55	-6.81154	1.6826
Disease free survival	=<1 year disease-free	12	-6.50666	0.829899	0.32*		74	-6.49779	1.99124	0.74*
	1-3 years disease-free	28	-6.42858	0.947948			132	-6.81837	1.88064
	>3 years disease-free	44	-6.80998	1.26764			89	-6.64693	1.7774
Age at start 1st line therapy	<=50 years	4	-6.33089	1.69907	0.20*		74	-6.70076	1.9198	0.051*
	50-70 years	47	-6.71137	1.1722			141	-7.00207	1.64477
	>70 years	33	-6.68142	1.23387			80	-6.1073	1.85155
Menopausal status at start 1st line theraapy	pre-menopausal	3	-6.65234	0.950432	0.45**		77	-6.3556	1.98557	0.36**
	post-menopausal	80	-6.69639	1.17618			218	-6.72423	1.7991
Dominant site of relapse	Local regional relapse	2	-5.99289	0.368836	0.29***		31	-5.94115	1.75869	0.002***
	Bone metastasis	40	-6.43286	1.2005			153	-6.57271	1.69584
	other metastasis	38	-6.73179	1.0897			111	-7.02879	1.91669
Progression-free survival	no progression	11	-7.21428	1.04697	0.005**		15	-5.76099	2.26751	0.25**
	progression	73	-6.60101	1.15179			280	-6.70076	1.80395
* Spearman
** Mann-Whitney
*** Kruskal Wallis
